1  
2  
3  
4  
5  
6  
7  
8  
9  
10  
11  
12  
13  
14  
15  
16  
17  
18  
19  
20  
21  
22  
23  
24  
25  
26  
27

## CD95/Fas ligand mRNA is toxic to cells

William Putzbach<sup>1,4</sup>, Ashley Haluck-Kangas<sup>1,4</sup>, Quan Q. Gao<sup>1</sup>, Aishe A. Sarshad<sup>3</sup>,  
Elizabeth T. Bartom<sup>2</sup>, Austin M. Stults<sup>1</sup>, Abdul S. Qadir<sup>1</sup>,  
Markus Hafner<sup>3</sup> and Marcus E. Peter<sup>1,2,\*</sup>

<sup>1</sup>Department of Medicine/Division Hematology/Oncology, Feinberg School of Medicine, and <sup>2</sup> Department of Biochemistry and Molecular Genetics, Northwestern University, Chicago, IL 60611, USA; <sup>3</sup> Laboratory of Muscle Stem Cells and Gene Regulation, NIAMS, NIH, Bethesda, MD 20892, USA.

\*Corresponding author: Marcus Peter, E-mail: m-peter@northwestern.edu, phone: 312-503-1291; FAX: 312-503-0189.

<sup>4</sup> Shared first authorship

Keywords:  
RNAi, Fas, cancer, CRISPR, cell death, DISE

28 **Abstract**

29 CD95/Fas ligand binds to the death receptor CD95 to induce apoptosis in sensitive cells. We  
30 previously reported the CD95L mRNA is enriched in sequences that, when converted to  
31 si/shRNAs, kill all cancer cells by targeting critical survival genes (Putzbach et al., 2017). We  
32 now report expression of full-length CD95L mRNA, itself, is highly toxic to cells and induces a  
33 similar form of cell death. We demonstrate that small (s)RNAs derived from CD95L are loaded  
34 into the RNA induced silencing complex (RISC) RISC which is required for the toxicity and that  
35 processing of CD95L mRNA into sRNAs is independent of both Dicer and Drosha. We provide  
36 evidence that in addition to the CD95L transgene a number of endogenous protein coding genes  
37 involved in regulating protein translation, particularly under low miRNA conditions, can be  
38 processed to sRNAs and loaded into the RISC suggesting a new level of cell fate regulation  
39 involving RNAi.

40

## 41 **Introduction**

42 Activation of CD95/Fas through interaction with its cognate ligand CD95L or receptor-activating  
43 antibodies induces apoptosis in sensitive cells (Suda, Takahashi, Golstein, & Nagata, 1993).  
44 Virtually all research on CD95 and CD95L has focused on the physical interaction between the  
45 two proteins and the subsequent protein-based signaling cascades (Algeciras-Schimmich et al.,  
46 2002; Fu et al., 2016; Nisihara et al., 2001; Schneider et al., 1997). However, we have recently  
47 shown that the mRNA of CD95 and CD95L harbor sequences that when converted into small  
48 interfering (si) or short hairpin (sh)RNAs, cause massive and robust toxicity in all tested cancer  
49 cells. These CD95/CD95L-derived si/shRNAs target a network of survival genes, resulting in the  
50 simultaneous activation of multiple cell death pathways through RNA interference (RNAi) in a  
51 process we called DISE (Death Induced by Survival gene Elimination) (Putzbach et al., 2017).  
52 We determined that for an si/shRNA to elicit this form of toxicity, only positions 2-7 of the guide  
53 strand, the 6mer seed sequence, are required (Putzbach et al., 2017). More recently, a screen of  
54 all 4096 6mer seeds revealed that optimal 6mer seed toxicity requires G-rich seeds targeting C-  
55 rich regions in the 3'UTRs of survival genes (Gao et al., 2018).

56 In this report, we show that expression of the CD95L mRNA itself is toxic to cells even  
57 without prior conversion to small (s)RNAs. This toxicity is independent of the full-length  
58 CD95L protein or expression of the CD95 receptor and resembles DISE. The toxicity also  
59 involves RNAi, We found that multiple small RNAs are generated from the mRNA of CD95L  
60 within cells and are loaded into the RNA-induced Silencing Complex (RISC), the key mediator  
61 of RNAi (Liu et al., 2004). Furthermore, we provide evidence that endogenous mRNAs can be  
62 processed into sRNAs and loaded into the RISC, especially in cells with low expression of  
63 miRNAs. The subset of genes found in the RISC are regulators of protein translation and cell  
64 proliferation.

65

## 66 **Results**

### 67 **CD95L mRNA is toxic to cells**

68 By testing every possible shRNA derived from the CD95L open reading frame (ORF) or its  
69 3'UTR, we recently found a high enrichment of toxic si/shRNAs derived from the CD95L ORF  
70 (Putzbach et al., 2017). More recently we determined that the 6mer seed toxicity observed in  
71 many si/shRNAs is largely due to their nucleotide composition, with G-rich seeds being the most  
72 toxic (Gao et al., 2018). When reanalyzing the CD95L ORF-derived shRNAs, we found a

73 significant correlation between the toxicity of the most toxic CD95L-derived shRNAs  
74 (Putzbach et al., 2017) and the seed toxicity of the corresponding 6mer seed we recently  
75 determined in a screen of all 4096 6mer seeds (Gao et al., 2018). This suggests that CD95L-  
76 derived si/shRNAs kill cancer cells, in large part through 6mer seed toxicity.

77 We therefore wondered whether expression of the CD95L ORF mRNA—without pre-  
78 processing into artificial siRNAs—would be toxic to cells. Expression of CD95L protein in most  
79 cells kills through the induction of apoptosis. Consequently, expressing CD95L in HeyA8 cells,  
80 which are highly sensitive to CD95 mediated apoptosis, killed cells within a few hours after  
81 infection with a lentivirus encoding CD95L (**Figure 1A**, left panel). Interestingly, severe growth  
82 reduction was seen without any signs of apoptosis (not shown) when a CD95L mutant, unable to  
83 bind CD95, was expressed (CD95L<sup>MUT</sup> in **Figure 1A**, left panel). This mutant carries an Y218R  
84 point mutation, that prevents the CD95L protein from binding to CD95 (Schneider et al., 1997),  
85 and is expressed at a similar level to wild type (wt) CD95L (**Figure 1B**). To prevent the CD95L  
86 mRNA from producing full-length CD95L protein, we also introduced a premature stop codon  
87 right after the start codon in the CD95L<sup>MUT</sup> vector (CD95L<sup>MUT</sup>NP). This construct (containing 4  
88 point mutations and confirmed to produce mRNA with no detectable full-length CD95L protein,  
89 **Figure 1B**) was similarly active in reducing the growth of HeyA8 cells compared to the  
90 CD95L<sup>MUT</sup> vector (**Figure 1A**, left panel). CD95L<sup>MUT</sup>NP still produced a reduced amount of a  
91 truncated and likely soluble CD95L (**Figure 1B**), likely due to use of an alternative start codon.  
92 However, the supernatant of 293T cells infected with this virus did not induce apoptosis when  
93 added to HeyA8 cells (data not shown) confirming that it had no apoptosis inducing activity.

94 This result suggested that the CD95L mRNA could be toxic to HeyA8 cells without the  
95 CD95L protein inducing apoptosis. This was confirmed by expressing the three CD95L  
96 constructs in the presence of the oligo-caspase inhibitor zVAD-fmk (**Figure 1A**, center panel).  
97 With suppressed apoptosis, all three constructs were now equally toxic to HeyA8 cells. Finally,  
98 we tested a HeyA8 CD95 k.o. clone confirmed to express no CD95 protein (Putzbach et al.,  
99 2017). In these cells, without the addition of zVAD-fmk, wt CD95L and CD95L<sup>MUT</sup>NP were  
100 again equally active in reducing the growth of the cells (**Figure 1A**, right panel). Together, these  
101 data suggested it is the CD95L mRNA that killed the cells. Cell death was confirmed by  
102 quantifying nuclear fragmentation (**Figure 1C**). We also detected a significant increase of ROS  
103 in cells expressing CD95L<sup>MUT</sup>NP (**Figure 1D**), which is a characteristic feature of DISE (Hadji  
104 et al., 2014; Patel & Peter, 2017). To exclude the possibility that truncated CD95 protein or any



105 part of the CD95 mRNA would play a role in this toxicity, we deleted the CD95 gene in MCF-7  
106 cells (**Figure 1 - figure supplement 1**). Overexpression of wild-type CD95L killed clone FA4  
107 cells, which harbor a complete homozygous deletion of the entire CD95 gene (exon 1 - 9), as  
108 well as CD95 protein k.o. clone #21 cells that retain some truncated mRNA expression (**Figure**  
109 **1E**).

110 Finally, to exclude that the truncated protein produced by the CD95L<sup>MUT</sup>NP construct had  
111 any unintended activity, we mutated the ATG start codon that most likely gave rise to the  
112 truncated CD95L to ATA (**Figure 1 - figure supplement 1A**). This CD95L<sup>MUT</sup>NP (G258A)  
113 mutant construct did not produce any detectable protein anymore (**Figure 1 - figure supplement**  
114 **1B**) but was as toxic to the CD95 k.o. HeyA8 cells as CD95L<sup>MUT</sup>NP (**Figure 1 - figure**  
115 **supplement 1C**).

116 Our experiments demonstrated that a small number of point mutations introduced into  
117 various CD95L mutants did not significantly affect the toxicity of CD95L mRNA. To determine  
118 whether a large number of mutations would reduce its toxicity, we generated a CD95L<sup>MUT</sup>NP  
119 mutant with 308 codon optimized silent point mutations (CD95L<sup>SIL</sup>) (**Figure 1 - figure**  
120 **supplement 3A**). The activity of this mutant construct to negatively affect cell growth of CD95  
121 k.o. HeyA8 cells was compared to two independently cloned wt CD95L constructs (WT1 and  
122 WT2 in **Figure 1 - figure supplement 3B**). The mutant SIL construct was equally effective in  
123 suppressing cell growth and produced about the same amount of CD95L mRNA (**Figure 1 -**  
124 **figure supplement 3C**). However, the SIL construct only produced about 12% of WT CD95L  
125 protein (**Figure 1 - figure supplement 3C**), again supporting the observation that it is the CD95L  
126 mRNA and not the protein that elicits toxicity.

127 We recently determined that a general toxicity of si/shRNAs is largely based on the  
128 composition of the 6mer seed sequence of the guide strand (Gao et al., 2018). We now plotted  
129 the toxicity of all sRNAs that can be derived from either the WT or the SIL mutant CD95L and  
130 found that the overall toxicity based on our toxicity screen performed in HeyA8 cells was not  
131 statistically different between the two CD95L constructs, (**Figure 1 - figure supplement 3D**)  
132 suggesting that toxic sequences are embedded in the CD95L<sup>SIL</sup> ORF. Taken together, our data  
133 indicate that even mutating more than 300 positions in CD95L still allows it to form toxic  
134 sRNAs suggesting that the toxicity of CD95L mRNA is a highly robust phenomenon.

135

136 **CD95L mRNA kills cells through DISE.**

137 After infection with CD95L, CD95 k.o. HeyA8 cells exhibited morphological changes  
138 strikingly similar to the changes seen in wt HeyA8 cells after introduction of a CD95L-derived  
139 shRNA (shL3) (**Figure 2A, Video 1-4**) suggesting the cells died through a similar mechanism.  
140 To determine the cause of cell death induced by CD95L mRNA in HeyA8 CD95 k.o. cells  
141 molecularly, we performed a RNA-Seq analysis. We found that expression of CD95L caused  
142 preferential downregulation of critical survival genes and not of nonsurvival genes in a control  
143 set (**Figure 2B**). In addition, cell death induced by CD95L mRNA resulted in a substantial loss  
144 of 11 of the 12 histones detected to be downregulated in cells treated with CD95 and CD95L-  
145 derived sh/siRNAs (**Figure 2C**). Loss of histones is an early event during DISE (Putzbach et al.,  
146 2017). A Metascape analysis demonstrated that nucleosome assembly, regulation of mitosis, and  
147 genes consistent with the involvement of histones were among the most significantly  
148 downregulated RNAs across all cells in which DISE was induced by any of the four sh/siRNAs  
149 or by the expression of CD95L mRNA (**Figure 2D**). This suggests that CD95L mRNA kills cells  
150 in the same way as CD95/L-derived si/shRNAs.

151

### 152 **CD95L mRNA kills cells through RNAi**

153 Given our previous work on CD95L-derived si/shRNA toxicity, we hypothesized that CD95L  
154 mRNA kills cells through an RNAi-based mechanism—perhaps by being processed into small  
155 RNAs that are incorporate into the RISC. Drosha k.o. cells lacking the majority of endogenous  
156 miRNAs, but retaining expression of Ago proteins, were shown to be hypersensitive to DISE  
157 induced by si- and shRNAs (Putzbach et al., 2017). We interpreted this effect as being caused by  
158 an increased pool of unoccupied RNAi machinery due to the absence of most miRNAs. Drosha  
159 k.o. cells were also hypersensitive to the expression of CD95L<sup>MUT</sup>NP (**Figure 3A**,  $p=0.014$ ,  
160 according to a polynomial fitting model); Virtually all cells died (insert in **Figure 3A**). To  
161 directly determine whether the RISC is involved in the toxicity, we introduced CD95L into  
162 CD95 k.o. HeyA8 cells after knocking down AGO2 (**Figure 3B**). Toxicity elicited by CD95L  
163 was blocked following AGO2 knockdown, suggesting that AGO2 was required for CD95L  
164 mRNA to be toxic. This was also the case when CD95 k.o. HeyA8 cells were infected with either  
165 the CD95<sup>MUT</sup>NP or the CD95<sup>SIL</sup> construct (**Figure 3 - figure supplement 3A**), confirming that all  
166 three CD95L versions killed cells with the help of the RISC. When parental HeyA8 cells were  
167 infected with CD95L WT or CD95L<sup>SIL</sup> they died so rapidly that the cells had to be plated before  
168 treatment with puromycin used to select for virus infected cells (**Figure 3 - figure supplement**

169 **3B**). As expected in these cells that died of canonical apoptosis, knockdown of AGO2 did not  
170 have any effect on cell viability. In contrast, cell death induced by CD95L<sup>MUT</sup>NP which in this  
171 experiment very efficiently killed the parental HeyA8 cells was severely blunted upon AGO2  
172 knockdown (**Figure 3 - figure supplement 3C**).

173 To test the hypothesis that Drosha k.o. cells were more sensitive because their RISC was not  
174 occupied by large amounts of nontoxic miRNAs and to determine whether CD95L mRNA could  
175 give rise to small RNAs that are incorporate into the RISC, we pulled down AGO1-4-associated  
176 RNAs and analyzed their composition in wt and Drosha k.o. cells after expressing the  
177 CD95L<sup>MUT</sup>NP mRNA. For the pull-down, we used a peptide derived from the AGO-binding  
178 protein GW182/TNRC6B recently described to bind to all four Ago proteins (Hauptmann et al.,  
179 2015). As expected in wt HCT116 cells, large amounts of small RNAs (19-23nt in length) were  
180 detected bound to the Ago proteins (**Figure 3C**). Both AGO1 and AGO2 were efficiently pulled  
181 down. In contrast, in the Drosha k.o. cells, which cannot generate canonical miRNAs, only a low  
182 amount of small RNAs was detected, confirming the absence of miRNAs in the RISC.  
183 Surprisingly, the amount of pulled down Ago proteins was severely reduced despite the fact  
184 these Drosha k.o. cells express comparable levels of AGO2 (Putzbach et al., 2017). This suggests  
185 the peptide did not have access to the Ago proteins in Drosha k.o. cells, presumably because it  
186 only efficiently binds to Ago proteins complexed with RNA as recently shown (Elkayam et al.,  
187 2017).

188 The analysis of all Ago-bound RNAs showed that in the wt cells, >98.4% of bound RNAs  
189 were miRNAs. In contrast, only 34% of bound RNAs were miRNAs in Drosha k.o. cells (**Figure**  
190 **3D** and data not shown). These include miRNAs that are processed independently of Drosha  
191 such as miR-320a (Kim, Kim, & Kim, 2016). Consequently, this miRNA became a major RNA  
192 species bound to Ago proteins in Drosha k.o. cells (**Figure 3D**). In both wt and Drosha k.o. cells,  
193 a significant increase in CD95L-derived small RNAs bound to the Ago proteins was detected in  
194 cells infected with the CD95L virus compared to cells infected with pLenti empty vector, as  
195 expected. They corresponded to 0.0006% and 0.043% of all the Ago-bound RNAs in the wt cells  
196 and Drosha k.o. cells, respectively. Toxicity of CD95L mRNA was, therefore, not due to  
197 overloading the RISC. In the absence of most miRNAs, the total amount of RNAs bound to Ago  
198 proteins in the Drosha k.o. cells was roughly 10% of the amount bound to Ago in wt cells  
199 (**Figure 3D**). The reduction of Ago-bound miRNAs in Drosha k.o. cells (**Figure 3E**, top row)  
200 was paralleled by a substantial increase in binding of other small RNAs to the Ago proteins

201 (**Figure 3E**, bottom row). Interestingly, the amount of Ago-bound CD95L-derived small RNAs  
202 was >100 times higher in the Drosha k.o. cells compared to the wt cells (red columns in **Figure**  
203 **3E**). These data support our hypothesis that Drosha k.o. cells are more sensitive to CD95L  
204 mRNA-mediated toxicity due to their ability to take up more toxic small CD95L-derived RNAs  
205 into the RISC in the absence of most miRNAs.

206

207 **CD95L ORF is degraded into small RNA fragments that are then loaded into the RISC.**

208 Interestingly, not only did Ago proteins in Drosha k.o. cells bind much more CD95L-derived  
209 small RNAs than in the wt cells, but also the peak length of the most abundant Ago-bound RNA  
210 species increased from 20 to 23 nt (**Figure 4A**, top panel). To determine the sites within the  
211 CD95L mRNA that gave rise to small Ago-bound RNAs, we aligned all small Ago-bound RNAs  
212 detected in all conditions to the CD95L ORF sequence (**Figure 4B and C**). We identified 22  
213 regions in the CD95L ORF that gave rise to small RNAs that could be bound by Ago proteins  
214 (**Figure 4B**). To determine whether these small RNAs were formed in the cytosol and then  
215 loaded into the RISC, we also aligned all small RNAs in the total RNA fraction isolated from  
216 CD95L<sup>MUT</sup>NP expressing HCT116 Drosha k.o. cells with CD95L (**Figure 4C**). Interestingly,  
217 very similar regions of small RNAs were found. Moreover, the mean as well as the peak of the  
218 distribution of the read lengths of small RNAs bound to Ago proteins was smaller than in the  
219 total small RNAs fraction (**Figure 4A**, center panel), suggesting these fragments were trimmed  
220 to the appropriate length either right before they were loaded into the RISC or by the RISC itself.  
221 This was most obvious for the small RNAs in cluster 3 (**Figure 4B and C**). We also noticed that  
222 certain small RNAs were more abundant in the Ago-bound fraction when compared to total RNA  
223 relative to all other RNAs. To determine whether this type of processing was specific for  
224 HCT116 Drosha k.o. cells, we analyzed the Ago-bound CD95L-derived sRNAs in HeyA8 CD95  
225 k.o. cells after expression of wt CD95L (**Figure 4D**) and compared them with the total RNA  
226 fraction (**Figure 4E**). While we found fewer CD95L-derived reads in these cells, the general  
227 location of some of the read clusters overlapped with the ones found in the Drosha k.o. cells and  
228 again both the mean and peak of the distribution of RNA lengths was smaller in the Ago-bound  
229 fraction versus the total RNA fraction (**Figure 4A**, bottom panel). Together, these data suggest  
230 that CD95L mRNA can be processed into smaller RNA fragments, which are then trimmed to a  
231 length appropriate for incorporation into the RISC.

232 Our data suggest that the CD95L mRNA, when overexpressed, is toxic to cells due to the  
233 formation of Ago-bound small RNAs that are incorporated into the RISC and kill cells through  
234 RNAi. This process is independent of Drosha. To determine whether Dicer is required for either  
235 processing of CD95L mRNA or loading the small RNAs into the RISC, we expressed  
236 CD95L<sup>MUT</sup>NP in wt and Dicer k.o. HCT116 cells (**Figure 4F**). Dicer k.o. cells were still  
237 sensitive to toxicity induced by CD95L mRNA expression, suggesting the toxicity of the CD95L  
238 mRNA does not require the processing by either Drosha or Dicer. Using custom real-time qPCR  
239 primers designed to specifically detect the small RNAs from clusters 8 and 21, we detected, in  
240 both wt and Dicer k.o. cells over-expressing CD95L<sup>MUT</sup>NP, fragments from these clusters  
241 (**Figure 4G**), demonstrating that Dicer is not involved in processing CD95L mRNA.

242 All the reported small RNAs derived from CD95L corresponded to the sense strand of the  
243 expressed mRNA, raising the question of how they could be processed into double-stranded  
244 sRNAs in the absence of an antisense strand. To get a preliminary answer to this question, we  
245 subjected the CD95L ORF mRNA sequence to a secondary structure prediction (**Figure 4 -**  
246 **figure supplement 1A**). According to this analysis, the CD95L ORF mRNA forms a tightly  
247 folded structure with many of the small RNAs of the 22 clusters juxtaposing each other in stem-  
248 like structures creating regions of significant complementarity. These may provide the duplexes  
249 needed to be processed and loaded into the RISC. Interestingly, many of the juxtaposing reads  
250 were found in duplex structures with 3' overhangs. Three of these oligonucleotides (derived from  
251 clusters 7, 15 and 22) when expressed as siRNAs were toxic to HeyA8, H460, M565 and 3LL  
252 cells (**Figure 4 - figure supplement 1B**).

253 To address the question of whether the complete CD95L ORF sequence was required to  
254 produce toxic sRNAs, we generated two CD95L fragments, one 5' fragment (280 nt) and one 3'  
255 fragment (559 nt) (**Figure 4 - figure supplement 2A**). When expressed in CD95 k.o. HeyA8  
256 cells, no protein was detected with the anti-CD95L antibody used but they were both  
257 significantly expressed at the RNA level albeit at lower levels than wt CD95L (**Figure 4 - figure**  
258 **supplement 2B**). Only the 5' fragment caused a small reduction in cell growth when  
259 compared to full length CD95L (**Figure 4 - figure supplement 2C**). While either of the two  
260 fragments were toxic to wt HCT116 cells, in the hypersensitive Drosha k.o. HCT116 cells both  
261 fragments showed weak toxicity (**Figure 4 - figure supplement 2D and 2E**). These data suggest  
262 that fragments of CD95L show reduced toxicity which could be due to their lower expression  
263 levels and/or their inability to properly fold and form sRNAs.



264

265 **mRNAs of multiple endogenous genes regulating proliferation are processed and loaded**  
266 **into the RISC.**

267 To address the question of whether in addition to exogenously expressed CD95L, mRNAs of  
268 endogenous genes would also be processed and loaded into the RISC, we interrogated the RNA-  
269 Seq data sets we had from Ago pull-down and total small RNA-Seq analyses in HCT116 wt and  
270 HCT116 Drosha k.o. cells. Genes processed in a similar way to CD95L mRNA would have to be  
271 significantly expressed at the mRNA level, and would give rise to multiple sRNAs that bound to  
272 the RISC more effectively in Drosha k.o. cells when compared to wt cells. We interrogated all  
273 data sets using the following parameters: We counted any gene that had at least one unique read  
274 that aligned only within its mRNA with a read count of 10 or more. We started by analyzing the  
275 Ago bound reads and then compared the location and size of the reads in these identified genes  
276 with the analysis of total small RNA of Drosha k.o. cells expressing CD95L. We found Ago  
277 bound reads of 10 or more reads/location that aligned with 5629 genes in the human genome. Of  
278 these genes ~10% were noncoding, 558 (~10%) were protein coding genes that met our criteria  
279 for processing, and 4498 genes (~80%) were protein coding genes that did not. The top ten most  
280 abundant processed coding genes with multiple unique reads in the RISC are shown in *Figure*  
281 *5A* and *B* and *Figure 5 - figure supplement 1A and B*. The ones most evenly processed are  
282 shown in *Figure 5B*. In almost all cases, similar to processed CD95L, the average length of the  
283 reads bound to the Ago proteins was smaller than the ones found in total RNA (*Figures 5A* and  
284 *Figure 5 - figure supplement 1A*). While these genes were abundantly expressed, they were not  
285 the most abundant mRNAs in these cells (*Figure 5C*). Of the protein coding genes with reads  
286 bound to Ago proteins many of them were highly expressed, yet they were not processed in this  
287 form (*Figure 5D*). When all small reads derived from these five genes were aligned with the  
288 human genome, we observed that: 1) The reads were between 5 - 10 times more abundant in the  
289 RISC of cells devoid of Drosha expression and 2) they were loaded equally efficiently in cells  
290 expressing the empty vector control or the CD95L expressing virus (*Figure 5 - figure*  
291 *supplement 2*).

292 The fact that many highly expressed protein coding genes were not processed raised the  
293 question of whether the processed and RISC loaded genes fell in certain functional clusters. To  
294 begin to address this question, we subjected all processed coding genes with RISC bound small  
295 RNAs to a DAVID gene ontology analysis. Strikingly, genes found in many of these enriched

296 clusters were involved in cell growth (light green rows in *Figure 5 - figure supplement 3A*).  
297 In fact, the most significantly enriched genes were involved in protein translation (dark green  
298 rows in *Figure 5 - figure supplement 3A*). Interestingly, in addition to cyclin D1, MYC (*Figure*  
299 *5B*) and CDK6 (*Supplementary File 1*) and many initiation and elongation factors, 38 of the  
300 mRNAs of the 50 ribosomal proteins (76%) in the analysis were processed in this way (*Figure 5*  
301 *- figure supplement 3B*). This suggests that proteins involved in protein translation may be  
302 marked to be processed and loaded into the RISC.

303 Our data suggest that mRNAs of endogenous protein coding genes can be processed and  
304 loaded into the RISC especially under low miRNA conditions. This raised the question of  
305 whether RISC loaded sRNAs could negative regulate cell growth. We noticed that Drosha k.o.  
306 cells consistently grew slower than their parental wt cells (*Figure 5E*). Based on our recent data  
307 on 6mer seed toxicity we wondered whether in the absence of most nontoxic and therefore  
308 protective miRNAs cells would incorporate sRNAs into the RISC that negative affect cell  
309 growth through a low level of survival gene targeting. To address this question, we compared the  
310 6mer seed toxicity of all sRNAs bound to Ago proteins in either wt or Drosha k.o. cells (*Figure*  
311 *5F*). The difference in predicted seed toxicity was striking. Most RISC bound sRNAs in wt cells  
312 were miRNAs with low seed toxicity (blue columns in *Figure 5F*). In contrast, in Drosha k.o.  
313 cells the majority of RISC bound sRNAs had a rather toxic 6mer seed (red columns in *Figure*  
314 *5F*). This suggested that such sRNAs may constantly put pressure on the expression of survival  
315 genes. To test this, we knocked down AGO2 in the Drosha k.o. cells and this treatment resulted  
316 in an increase of their growth rate that was now similar to the one observed in wt cells (*Figure*  
317 *5G*). These data suggest that endogenous RISC bound sRNAs may regulate cell growth through  
318 the DISE mechanism.

319 In summary, our data suggest that si- and/or shRNAs with certain seed sequences present in  
320 CD95 and CD95L and the entire CD95L ORF are toxic to cancer cells. The CD95L mRNA is  
321 processed into sRNAs that are loaded into the RISC that then target critical survival genes. This  
322 results in cell death largely through 6mer seed toxicity. This process is independent of both  
323 Drosha and Dicer. Furthermore, our data suggest that a high miRNA content, by "filling up" the  
324 RISC, might render cells less sensitive to this form of cell death and that multiple endogenous  
325 mRNAs are processed and loaded into the RISC and may regulate cell fate.

326

327 **Discussion**

328 We recently reported a novel form of cell death that was observed after expression of  
329 si/shRNAs designed from the sequences of CD95/CD95L mRNA (Putzbach et al., 2017). More  
330 recently we described that cells die from a loss of multiple survival genes through a mechanism  
331 we call 6mer seed toxicity (Gao et al., 2018). The most toxic si/shRNAs derived from CD95 or  
332 CD95L were found in the ORF of CD95L (Putzbach et al., 2017). This pointed toward the  
333 CD95L mRNA itself being toxic.

334 We now show that expression of full-length CD95L mRNA triggers toxicity that is  
335 independent of the protein product and canonical apoptosis. This is intriguing considering that  
336 previous studies showed transgenic expression of CD95L using viruses killed multiple cancer  
337 cells that were completely resistant to CD95 mediated apoptosis (EIOjeimy et al., 2006; Hyer,  
338 Voelkel-Johnson, Rubinchik, Dong, & Norris, 2000; Sudarshan et al., 2005; Sun et al., 2012).  
339 These results were interpreted as intracellular CD95L triggering apoptosis more efficiently than  
340 when added to the cells. However, we now provide an alternate explanation—namely, both the  
341 CD95L protein *and* mRNA are toxic to cells through distinct mechanisms. The protein induces  
342 apoptosis, and the mRNA induces toxicity through an RNAi-based mechanism.

343 We demonstrate that Dicer and Drosha are not involved in generating the Ago-bound  
344 CD95L-derived fragments but there are several candidate RNases that are capable of processing  
345 mRNAs. Given the differences in length distribution between the cytosolic versus Ago-bound  
346 RNA fragments, it is likely that CD95L-derived fragment intermediates are incorporated into the  
347 RISC and then trimmed to the appropriate length by Ago. Indeed, a similar mechanism is known  
348 to occur during the maturation of the erythropoietic miR-451, where the pre-miRNA is first  
349 cleaved by AGO2 and then trimmed at the 3' end to the final mature form by the  
350 exoribonuclease PARN (Yoda et al., 2013). Furthermore, a similar process occurs with the  
351 recently identified class of Ago-bound RNAs called agotrons (Hansen et al., 2016), which  
352 consist of an excised intron loaded into the RISC in a manner independent of Drosha or Dicer  
353 pre-processing. After trimmed to the appropriate size, the guide RNAs in complex with the RISC  
354 can regulate gene expression through RNAi.

355 Our data provide the first evidence of an overexpressed cDNA to be toxic via an RNAi-  
356 dependent mechanism. It was first shown in plants that overexpressed transgenes can be  
357 converted into RNAi active short RNA sequences (Hamilton & Baulcombe, 1999). Our data on  
358 the effects of overexpressed CD95L RNA, while mechanistically distinct from what was  
359 reported in plants, may be the first example of a transgene determining cell fate through the



360 RNAi mechanism in mammalian cells. The CD95L-derived sRNAs will likely act in a  
361 miRNA-like fashion by targeting 3'UTRs of survival genes through 6mer seed toxicity (Gao et  
362 al., 2018). CAG-repeat-containing mRNAs have been shown to induce sRNA formation and  
363 cellular toxicity via RNAi (Banez-Coronel et al., 2012). However, we recently reported that  
364 these sCAGs likely target fully complementary CUG containing repeat regions in the ORFs of  
365 genes critical for cell survival in an siRNA-like mechanism (Murmann, Gao, et al., 2018;  
366 Murmann, Yu, Opal, & Peter, 2018).

367 In addition to the activity of exogenously added CD95L mRNA, we also provide evidence  
368 that certain endogenous coding mRNAs can be processed into multiple sRNAs that are then  
369 loaded into the RISC. Small mRNA-derived RNAs have been reported to be bound to all four  
370 Ago proteins before (Burroughs et al., 2011). However, they were very small in numbers and  
371 amount and no specific cellular function could be ascribed to them. In contrast, we now show  
372 that in cells with disabled miRNA processing, about 5% of the human genome can be processed  
373 in this way and that these genes are strongly enriched in GO terms associated with protein  
374 translation (initiation and elongation) as well as with cell cycle regulation and cell proliferation.  
375 They contain a large number of 5' TOP genes (i.e. 76% of all ribosomal proteins) required for  
376 protein translation (Yamashita et al., 2008). Our findings may be relevant for situations in which  
377 cellular miRNA levels are low, such as in somatic stem cells (Morin et al., 2008) or in advanced  
378 cancers which are characterized by a global downregulation of all miRNAs (Lu et al., 2005). It is  
379 intriguing to note that the genes that are part of this group fall into GO clusters overlapping with  
380 the ones we found downregulated in cells undergoing DISE (Gao et al., 2018; Putzbach et al.,  
381 2017).

382 A major question that arises from our data is whether CD95L mRNA is toxic *in vivo*. We and  
383 others have noticed upregulation of CD95L in multiple stress-related conditions such as after  
384 treatment with chemotherapy ((Friesen, Fulda, & Debatin, 1999) and data not shown). While the  
385 amount of CD95L mRNA and the level of upregulation alone may not be enough to be toxic, it  
386 could be the combination of multiple RNA fragments, derived from multiple different mRNAs  
387 that are generated to kill cells (Putzbach et al., 2018). We view CD95L as just one of many  
388 RNAs that have this activity. It is unlikely CD95L is the only gene whose mRNA is toxic to  
389 cells, as this mRNA-based level of toxicity would be redundant with the potent killing capacity  
390 of the CD95L protein. Also, upregulating an mRNA that, by itself, could decimate the cells that  
391 would otherwise need to upregulate that mRNA to carry out their biological function in the first

392 place, such as in activated T cells upregulating CD95L to mount an immune response, would  
393 be self-defeating. Therefore, nature likely distributed this mRNA-based toxicity-inducing  
394 capacity over many genes in the genome to prevent activating it when any one of those genes is  
395 upregulated during specific cellular processes. It is more likely there exists an entire network of  
396 these genes that can release toxic small RNAs when the appropriate stimulus is encountered.  
397 Consistent with this hypothesis we recently identified other genes that contain sequences that  
398 when converted to shRNAs kill cancer cells through 6mer seed toxicity (Patel & Peter, 2017).  
399 Future work will be aimed at studying the coding genes that are found in the RISC, identifying  
400 additional genes and the mechanism through which they are processed and under what  
401 conditions they kill cells.  
402

403 **Materials and methods**

**Key Resources Table**

| <b>Reagent type (species) or resource</b> | <b>Designation</b>                 | <b>Source or reference</b> | <b>Identifiers</b> | <b>Additional information</b>                                                                                                                                                                                                                                   |
|-------------------------------------------|------------------------------------|----------------------------|--------------------|-----------------------------------------------------------------------------------------------------------------------------------------------------------------------------------------------------------------------------------------------------------------|
| Gene (Homo sapiens)                       | CD95L                              | NA                         | NM_000639          |                                                                                                                                                                                                                                                                 |
| Gene (H. sapiens)                         | CD95                               | NA                         | NM_000043          |                                                                                                                                                                                                                                                                 |
| Cell line (H. sapiens)                    | MCF-7                              | ATCC                       | ATCC: HTB-22       | Human adenocarcinoma of the mammary gland, breast; derived from metastatic site: pleural effusion                                                                                                                                                               |
| Cell line (H. sapiens)                    | MCF-7 CD95 $\Delta$ shR6 clone #21 | this paper                 | NA                 | MCF-7 CD95 $\Delta$ shR6 clone #21 with homozygous 227 nucleotide deletion of the shR6 target site in CD95 (chr10:89,008,920-89,009,146; Human Dec. 2013 GRCh38/hg38 assembly) produced using CRISPR/Cas9 technology; verified homozygous CD95 protein knockout |
| Cell line (H. sapiens)                    | MCF-7 CD95 deletion clone FA4      | this paper                 | NA                 | MCF-7 CD95 deletion clone FA4 with a homozygous deletion of the entire CD95 gene (chr10:88,990,657 - 89,015,785; Human Dec. 2013 GRCh38/hg38 assembly) produced using CRISPR/Cas9 technology; verified homozygous CD95 protein knockout                         |
| Cell line (H. sapiens)                    | HeyA8                              | PMID: 4016745              | RRID: CVCL_8878    | Human high grade ovarian serous adenocarcinoma; derived from parent Hey cells (RRID: CVCL_0297)                                                                                                                                                                 |

|                          |                                                         |                                                            |                                  |                                                                                                                                                                                                                                                      |
|--------------------------|---------------------------------------------------------|------------------------------------------------------------|----------------------------------|------------------------------------------------------------------------------------------------------------------------------------------------------------------------------------------------------------------------------------------------------|
| Cell line (H. sapiens)   | HeyA8 shR6 k.o. clone #11, HeyA8 CD95 k.o.              | PMID: 29063830                                             | NA                               | HeyA8 CD95 k.o. clone with a homozygous 227 nucleotide deletion of the shR6 target site in CD95 (chr10:89,008,920-89,009,146; Human Dec. 2013 GRCh38/hg38 assembly) produced using CRISPR/Cas9 technology; verified homozygous CD95 protein knockout |
| Cell line (H. sapiens)   | HCT116                                                  | Korean Collection for Type Cultures (KCTC)                 | KCTC: cat#HC19023; ATCC: CCL_247 | Human colorectal carcinoma                                                                                                                                                                                                                           |
| Cell line (H. sapiens)   | Drosha <sup>-/-</sup> ; Drosha <sup>-/-</sup> clone #40 | Korean Collection for Type Cultures (KCTC); PMID: 26976605 | KCTC: cat#HC19020                | HCT116 clone #40 with homozygous protein knockout of Drosha; knockout achieved using CRISPR/Cas9 which resulted in a single nucleotide insertion in one allele and a 26 nucleotide deletion in the other                                             |
| Cell line (H. sapiens)   | Dicer <sup>-/-</sup> ; Dicer <sup>-/-</sup> clone #43   | Korean Collection for Type Cultures (KCTC); PMID: 26976606 | KCTC: cat#HC19023                | HCT116 clone #43 with homozygous protein knockout of Dicer; knockout achieved using CRISPR/Cas9 which resulted in a three nucleotide insertion and 14 nucleotide deletion in one allele and a 35 nucleotide deletion in the other                    |
| Cell line (H. sapiens)   | Dicer <sup>-/-</sup> ; Dicer <sup>-/-</sup> clone #45   | Korean Collection for Type Cultures (KCTC); PMID: 26976607 | KCTC: cat#HC19024                | HCT116 clone #45 with homozygous protein knockout of Dicer; knockout achieved using CRISPR/Cas9 which resulted in a 53 nucleotide deletion in one allele and a 28 nucleotide deletion in the other                                                   |
| Cell line (H. sapiens)   | 293T                                                    | ATCC                                                       | ATCC: CRL-3216                   | Derived from HEK293 cells (ATCC: CRL-1573); express large T antigen; used for packaging viruses                                                                                                                                                      |
| Cell line (H. sapiens)   | H460                                                    | ATCC                                                       | ATCC: #HTB-177                   | Human lung pleural effusion carcinoma                                                                                                                                                                                                                |
| Cell line (Mus musculus) | 3LL                                                     | ATCC                                                       | ATCC #CRL-1642                   | Mouse Lewis lung carcinoma                                                                                                                                                                                                                           |

|                             |                                                          |                   |                                         |                                                                                                    |
|-----------------------------|----------------------------------------------------------|-------------------|-----------------------------------------|----------------------------------------------------------------------------------------------------|
| Cell line<br>(Mus musculus) | M565                                                     | PMID:<br>25366259 | NA                                      | Mouse hepatocellular carcinoma isolated from naturally occurring tumor in a floxed CD95 background |
| Antibody                    | anti-human AGO1 (rabbit monoclonal)                      | Cell Signaling    | Cell Signaling #5053                    | 1:2000; for western blot; primary Ab                                                               |
| Antibody                    | anti-human AGO1 (rabbit polyclonal)                      | Abcam             | Abcam #98056                            | 1:2000; for western blot; primary Ab                                                               |
| Antibody                    | anti-human AGO2 (rabbit polyclonal)                      | Abcam             | Abcam #32381                            | 1:500; for western blot; primary Ab                                                                |
| Antibody                    | Goat anti-rabbit, IgG-HRP                                | Southern Biotech  | Southern Biotech: cat#SB-4030-05        | 1:5000; for western blot; secondary Ab                                                             |
| Antibody                    | Anti-Argonaute-2 antibody (rabbit monoclonal) [EPR10411] | Abcam             | Abcam #186733                           | 1:1200; for western blot; primary Ab                                                               |
| Antibody                    | Anti-Human CD178 antibody (Mouse IgG1) Clone G247-4      | BD Pharmingen     | BD Pharmingen #556387                   | 1 µg/ml; for western blot; primary Ab                                                              |
| Antibody                    | Anti-CD95 (rabbit polyclonal, C-20)                      | Santa Cruz        | Santa Cruz #sc-715 (since discontinued) | 1:1000; for western blot; primary Ab                                                               |
| Antibody                    | Goat anti-rabbit, IgG-HRP                                | Cell Signaling    | Cell Signaling: cat#7074                | 1:2000; for western blot; secondary Ab                                                             |
| Antibody                    | Goat anti-mouse; IgG1-HRP                                | Southern Biotech  | Southern BioTech: cat#1070-05           | 1:5000; for western blot; secondary Ab                                                             |
| Recombinant protein reagent | LzCD95L                                                  | PMID:<br>14504390 | NA                                      | Leucine zipper tagged CD95L; recombinant protein                                                   |
| Chemical compound           | CellTiter-Glo                                            | Promega           | Promega #G7570                          | Detects ATP release as a surrogate for cell death; read-out is fluorescence                        |
| Chemical compound           | propidium iodide                                         | Sigma-Aldrich     | Sigma-Aldrich: cat#P4864                | Used for subG1 flow cytometry analysis                                                             |

|                         |                                            |                         |                               |                                                                                                                                                                                                                                                      |
|-------------------------|--------------------------------------------|-------------------------|-------------------------------|------------------------------------------------------------------------------------------------------------------------------------------------------------------------------------------------------------------------------------------------------|
| Chemical compound       | puromycin                                  | Sigma-Aldrich           | Sigma-Aldrich: cat#P9620      | Used for selection of cells expressing puromycin resistance cassettes                                                                                                                                                                                |
| Chemical compound       | 2',7'-dichlorodihydrofluorescein diacetate | ThermoFisher Scientific | ThermoFisher Scientific #D399 | Dye used for detecting ROS production                                                                                                                                                                                                                |
| Chemical compound       | zVAD-fmk                                   | Sigma-Aldrich           | Sigma-Aldrich: cat#V116       | Used at 20uM; pan caspase inhibitor                                                                                                                                                                                                                  |
| Recombinant DNA reagent | pLenti-GIII-CMV-RFP-2A-Puro vector; pLenti | ABM Inc                 | NA                            | pLenti control empty lentiviral vector; carries an RFP-2a-puromycin resistance cassette                                                                                                                                                              |
| Recombinant DNA reagent | pLenti-CD95L                               | this paper              | NA                            | pLenti-GIII-CMV-RFP-2A-Puro vector that expresses human wild type CD95L cDNA (NM_000639.2); used to express wt human CD95L upon infection with lentiviral particles                                                                                  |
| Recombinant DNA reagent | pLenti-CD95L <sup>MUT</sup>                | this paper              | NA                            | pLenti-GIII-CMV-RFP-2A-Puro vector that expresses human CD95L cDNA (NM_000639.2) with 2 nucleotide substitutions in codon 218 (TAT -> CGT) resulting in replacement of tyrosine for arginine (Y218R mutation); unable to bind CD95                   |
| Recombinant DNA reagent | pLenti-CD95L <sup>MUT</sup> <sub>NP</sub>  | this paper              | NA                            | pLenti-GIII-CMV-RFP-2A-Puro vector that expresses human CD95L cDNA (NM_000639.2) with both the Y218R mutation and a single nucleotide substitution at the second codon (CAG -> TAG), resulting in a premature stop codon right after the start codon |

|                         |                                        |                         |                                       |                                                                                                                                                                                                                                                                                                                                                                                                                   |
|-------------------------|----------------------------------------|-------------------------|---------------------------------------|-------------------------------------------------------------------------------------------------------------------------------------------------------------------------------------------------------------------------------------------------------------------------------------------------------------------------------------------------------------------------------------------------------------------|
| Recombinant DNA reagent | pLenti-CD95L <sup>SIL</sup>            | this paper              | NA                                    | pLenti-GIII-CMV-RFP-2A-Puro vector that expresses human CD95L cDNA (NM_000639.2) with all codons containing synonymous mutations except for select codons in the proline-rich domain to meet IDT synthesis criteria                                                                                                                                                                                               |
| Transfected construct   | gRNA scaffold                          | PMID: 23287722          | IDT: synthesized as gene block        | 455 nucleotide CRISPR/Cas9 gRNA scaffold synthesized as a gene block; contains promoter, gRNA scaffold, target sequence, and termination sequence; scaffold transcribes gRNAs that target Cas9 endonuclease to cut at target sites; target sequences consist of 19 nucleotides that are complementary to the target site of choice; co-transfected with Cas9 to catalyze cleavage.                                |
| Recombinant DNA reagent | pLenti-CD95L <sup>MUT</sup> NP (G258A) | This paper              | NA                                    | pLenti-GIII-CMV-RFP-2A-Puro vector that expresses human CD95L cDNA (NM_000639.2) with the Y218R mutation, and two additional single nucleotide substitutions; one at the second codon (CAG -> TAG), resulting in a premature stop codon right after the start codon, and another, G258A, resulting in the replacement of a methionine with an isoleucine, thus removing the alternative translational start site. |
| Transfected construct   | pMJ920 Cas9 plasmid                    | Addgene; PMID: 23386978 | Addgene: cat#42234                    | Plasmid that expresses a human codon-optimized Cas9 tagged with GFP and HA; used to express Cas9 for CRISPR-mediated deletions.                                                                                                                                                                                                                                                                                   |
| Chemical compound       | Lipofectamine 2000                     | ThermoFisher Scientific | ThermoFisher Scientific: cat#11668019 | Transfection reagent                                                                                                                                                                                                                                                                                                                                                                                              |

|                         |                                   |                         |                                       |                                                                                                                          |
|-------------------------|-----------------------------------|-------------------------|---------------------------------------|--------------------------------------------------------------------------------------------------------------------------|
| Chemical compound       | Lipofectamine RNAiMAX             | ThermoFisher Scientific | ThermoFisher Scientific: cat#13778150 | Transfection reagent; used for transfection of small RNAs such as siRNAs                                                 |
| Commercial assay or kit | StrataClone Blunt PCR Cloning Kit | Agilent Technologies    | Agilent Technologies: cat#240207      | Used to blunt-end clone the gRNA scaffolds into the pSC-B plasmid                                                        |
| Genetic reagent         | Taqman Gene expression master mix | ThermoFisher Scientific | #4369016                              |                                                                                                                          |
| Sequence-based reagent  | shR6 flanking Fr primer           | IDT                     | IDT: custom DNA oligo                 | Fr primer that flanks shR6 site; used to detect 227 nt shR6 deletion; 5'-GGTGTCATGCTGTGACTGTG-3'                         |
| Sequence-based reagent  | shR6 flanking Rev primer          | IDT                     | IDT: custom DNA oligo                 | Rev primer that flanks shR6 site; used to detect 227 nt shR6 deletion; 5'-TTAGCTTAAGTGGCCAGCAA-3'                        |
| Sequence-based reagent  | shR6 internal Rev primer          | IDT                     | IDT: custom DNA oligo                 | Rev primer that overlaps with the shR6 site; used to detect 227 nt shR6 deletion; 5'-AAGTTGGTTTACATCTGCA C-3'            |
| Sequence-based reagent  | CD95 flanking Fr primer           | IDT                     | IDT: custom DNA oligo                 | Fr primer that flanks the CD95 gene; used to detect CD95 gene deletion; 5'-TGTTTAATATAGCTGGGGC TATGC-3'                  |
| Sequence-based reagent  | CD95 flanking Rev primer          | IDT                     | IDT: custom DNA oligo                 | Rev primer that flanks the CD95 gene; used to detect CD95 gene deletion; 5'-TGGGACTCATGGGTAAATAGAAT-3'                   |
| Sequence-based reagent  | CD95 internal Rev primer          | IDT                     | IDT: custom DNA oligo                 | Rev internal primer that targets within the CD95 gene; used to detect CD95 gene deletion; 5'-GACCAGTCTTCTCATTTCAGAGGT-3' |



|                        |             |      |                                                                         |                                                                                                                                                                               |
|------------------------|-------------|------|-------------------------------------------------------------------------|-------------------------------------------------------------------------------------------------------------------------------------------------------------------------------|
| Sequence-based reagent | siScr/siNT1 | IDT; | IDT: custom DNA oligo                                                   | control non-targeting siRNA; sense: UGGUUUACAUGUCGACUA A-3'                                                                                                                   |
| Sequence-based reagent | c7/1        | IDT  | custom siRNA; antisense strand corresponds to cluster 7 CD95L sequence  | antisense: 5'-AUUGGGCCUGGGGAUGUU U-3'; antisense strand designed with 3' deoxy AA; complementary sense strand has 3' deoxy TT and 2'-O-methylation at the first two positions |
| Sequence-based reagent | c7/2        | IDT  | custom siRNA; antisense strand corresponds to cluster 7 CD95L sequence  | antisense: 5'-CCUGGGGAUGUUUCAGCU C-3'; antisense strand designed with 3' deoxy AA; complementary sense strand has 3' deoxy TT and 2'-O-methylation at the first two positions |
| Sequence-based reagent | c11         | IDT  | custom siRNA; antisense strand corresponds to cluster 11 CD95L sequence | antisense: 5'-CCAACUCAAGGUCCAUGC C-3'; antisense strand designed with 3' deoxy AA; complementary sense strand has 3' deoxy TT and 2'-O-methylation at the first two positions |
| Sequence-based reagent | c15/1       | IDT  | custom siRNA; antisense strand corresponds to cluster 15 CD95L sequence | antisense: 5'-AACUGGGCUGUACUUUG U-3'; antisense strand designed with 3' deoxy AA; complementary sense strand has 3' deoxy TT and 2'-O-methylation at the first two positions  |
| Sequence-based reagent | c15/2       | IDT  | custom siRNA; antisense strand corresponds to cluster 15 CD95L sequence | antisense: 5'-AACUGGGCUGUACUUUGU A-3'; antisense strand designed with 3' deoxy AA; complementary sense strand has 3' deoxy TT and 2'-O-methylation at the first two positions |

|                                |                                |                         |                                                                         |                                                                                                                                                                               |
|--------------------------------|--------------------------------|-------------------------|-------------------------------------------------------------------------|-------------------------------------------------------------------------------------------------------------------------------------------------------------------------------|
| Sequence-based reagent         | c16/1                          | IDT                     | custom siRNA; antisense strand corresponds to cluster 16 CD95L sequence | antisense: 5'-CAACAACCUGCCCCUGAG C-3'; antisense strand designed with 3' deoxy AA; complementary sense strand has 3' deoxy TT and 2'-O-methylation at the first two positions |
| Sequence-based reagent         | c16/2                          | IDT                     | custom siRNA; antisense strand corresponds to cluster 16 CD95L sequence | antisense: 5'-AACUCUAAGCGUCCCCAG G-3'; antisense strand designed with 3' deoxy AA; complementary sense strand has 3' deoxy TT and 2'-O-methylation at the first two positions |
| Sequence-based reagent         | c21                            | IDT                     | custom siRNA; antisense strand corresponds to cluster 21 CD95L sequence | antisense: 5'-UCAACGUAUCUGAGCUCU C-3'; antisense strand designed with 3' deoxy AA; complementary sense strand has 3' deoxy TT and 2'-O-methylation at the first two positions |
| Sequence-based reagent         | c22                            | IDT                     | custom siRNA; antisense strand corresponds to cluster 22 CD95L sequence | antisense: 5'-AAUCUCAGACGUUUUUCG G-3'; antisense strand designed with 3' deoxy AA; complementary sense strand has 3' deoxy TT and 2'-O-methylation at the first two positions |
| Sequence-based reagent         | siCtr pool                     | Dharmacon               | D-001810-10                                                             | control non-targeting siRNA pool                                                                                                                                              |
| Sequence-based reagent         | SMARTpool siRNA targeting AGO2 | Dharmacon               | L-004639-00-0005                                                        | siRNA pool designed to target AGO2                                                                                                                                            |
| Sequence based reagent (human) | GAPDH primer                   | Thermofisher Scientific | Hs00266705_g 1                                                          | RT-qPCR; control probe                                                                                                                                                        |
| Sequence based reagent (human) | CD95L primers                  | Thermofisher Scientific | Hs00181226_g 1; Hs00181225_m 1                                          | RT-qPCR                                                                                                                                                                       |

|                                |                                   |                         |                                  |                                                                                                                                                                                                                                                                                                                                                |
|--------------------------------|-----------------------------------|-------------------------|----------------------------------|------------------------------------------------------------------------------------------------------------------------------------------------------------------------------------------------------------------------------------------------------------------------------------------------------------------------------------------------|
| Sequence based reagent (human) | CD95 primers                      | ThermoFisher Scientific | Hs00531110_m1;<br>Hs00236330_m1  | RT-qPCR                                                                                                                                                                                                                                                                                                                                        |
| Sequence based reagent (human) | CD95L <sup>SIL</sup> primer       | ThermoFisher Scientific | assay ID: APNKTUD                | Custom RT-qPCR primer designed using the ThermoFisher Scientific design tool to detect CD95L <sup>SIL</sup> mRNA                                                                                                                                                                                                                               |
| Sequence based reagent (human) | Cluster 8 CD95L small RNA primer  | ThermoFisher Scientific | custom probe Assay ID: CT7DPEM   | Custom RT-qPCR primer designed using the ThermoFisher Scientific design tool at <a href="https://www.thermoFisher.com/order/custom-genomic-products/tools/small-rna">https://www.thermoFisher.com/order/custom-genomic-products/tools/small-rna</a> to specifically detect small RNAs from cluster 8 of CD95L (5'-AAGGAGCTGGCAGAACTC CGAGA-3') |
| Sequence based reagent (human) | Cluster 21 CD95L small RNA primer | ThermoFisher Scientific | custom probe Assay ID: CTAADA    | Custom RT-qPCR primer designed using the ThermoFisher Scientific design tool at <a href="https://www.thermoFisher.com/order/custom-genomic-products/tools/small-rna">https://www.thermoFisher.com/order/custom-genomic-products/tools/small-rna</a> to specifically detect small RNAs from cluster 21 of CD95L (5'-TCAACGTATCTGAGCTCTC TC-3')  |
| Sequence based reagent (human) | z30 primer                        | ThermoFisher Scientific | ThermoFisher Scientific #4427975 | RT-qPCR for small RNA; control probe                                                                                                                                                                                                                                                                                                           |
| Peptide, recombinant protein   | Flag-GST-T6B peptide              | PMID: 26351695          | NA                               | Peptide derived from GW182/TNRC6B used to pull down AGO1 to 4                                                                                                                                                                                                                                                                                  |
| Commercial assay or kit        | anti-Flag M2 magnetic beads       | Sigma-Aldrich           | Sigma-Aldrich #M8823             |                                                                                                                                                                                                                                                                                                                                                |

404

405 **Reagents and antibodies**

406 All reagents and antibodies were described previously (Putzbach et al., 2017) except those  
407 referenced in the following paragraphs.

408

409 **Cell lines**

410 HeyA8 (RRID:CVCL\_8878) and HeyA8 CD95 knock-out cells, HCT116 (ATCC #CCL-247;  
411 RRID:CVCL\_0291) and HCT116 Drosha knock-out and Dicer knock-out cells, MCF-7 cells  
412 (ATCC #HTB-22; RRID:CVCL\_0031), and 293T (ATCC #CRL-3216; RRID:CVCL\_0063)  
413 cells were cultured as described previously (Putzbach et al., 2017). The MCF-7 CD95 knock-out  
414 and deletion cells were cultured in RPMI 1640 medium (Cellgro #10-040-CM), 10% heat-  
415 inactivated FBS (Sigma-Aldrich), 1% L-glutamine (Mediatech Inc), and 1%  
416 penicillin/streptomycin (Mediatech Inc). H460 (ATCC #HTB-177; RRID:CVCL\_0459) cells  
417 were cultured in RPMI1640 medium (Cellgro Cat#10-040) supplemented with 10% FBS (Sigma  
418 Cat#14009C) and 1% L-Glutamine (Corning Cat#25-005). 3LL cells (ATCC #CRL-1642;  
419 RRID:CVCL\_4358) were cultured in DMEM medium (Gibco Cat#12430054) supplemented  
420 with 10% FBS and 1% L-Glutamine. Mouse hepatocellular carcinoma cells M565 cells were  
421 described previously (Ceppi et al., 2014) and cultured in DMEM/F12 (Gibco Cat#11330)  
422 supplemented with 10% FBS, 1% L-Glutamine and ITS (Corning #25-800-CR). All cell lines  
423 were authenticated using STR profiling and tested monthly for mycoplasma using Plasmotest  
424 (Invitrogen).

425

426 **Plasmids and constructs**

427 The pLenti-CD95L was synthesized by sub-cloning an insert containing the CD95L ORF  
428 (NM\_000639.2; synthesized by IDT as minigene with flanking 5' *NheI* RE site and 3' *XhoI* RE  
429 sites in pIDTblue vector) into the pLenti-GIII-CMV-RFP-2A-Puro vector (ABM Inc). The insert  
430 and the backbone were digested with *NheI* (NEB #R0131) and *XhoI* (NEB #R0146) restriction  
431 enzymes. Subsequent ligation with T4 DNA ligase created the pLenti-CD95L vector. The  
432 pLenti-CD95L<sup>MUT</sup> vector was created by sub-cloning a CD95L cDNA insert with 2 nucleotide  
433 substitutions in codon 218 (*TAT* -> *CGT*) resulting in replacement of tyrosine for arginine, which  
434 has been described to inhibit binding to CD95 (Schneider et al., 1997) into the pLenti-GIII-  
435 CMV-RFP-2A-Puro vector. The pLenti-CD95L<sup>MUT</sup>NP vector was created by inserting a CD95L  
436 ORF cDNA sequence containing both the Y218R mutation and a single nucleotide substitution at  
437 the second codon (*CAG* -> *TAG*), resulting in a premature stop codon right after the start codon,  
438 into the pLenti-GIII-CMV-RFP-2A-Puro vector. The pLenti-CD95L<sup>SIL</sup> was created by sub-  
439 cloning a mutant CD95L ORF cDNA sequence with codons synonymously mutated (**Figure 1 -**

440 *figure supplement 3A*) to the next most highly utilized codon in human cells (exceptions were  
441 made within the proline rich domain(Novoradovsky et al., 2005) to meet gene synthesis design  
442 criteria) into the pLenti-GIII-CMV-RFP-2A-Puro vector. The GenScript Codon Usage  
443 Frequency Table Tool for Expression Host Organism: Human  
444 (<https://www.genscript.com/tools/codon-frequency-table>) was used to determine codon use  
445 frequencies.

446 The pLenti-CD95LMUTNP (G258A) mutant was generated by site-directed mutagenesis.  
447 Identification of the ATG giving rise to the 24 kDa CD95LMUTNP peptide was predicted using  
448 the Sequence Manipulation Suite (Stothard, 2000). The next methionine downstream of the  
449 premature stop codon was predicted to produce a 22.27 kDa protein, and thus was mutated to an  
450 isoleucine (ATG > ATA). The Agilent QuikChange Primer Design tool was used to design  
451 mutagenesis primers (Novoradovsky et al., 2005). The following primers were synthesized by  
452 IDT with 5' phosphorylation and were PAGE purified 5'-  
453 GCCTGTGCTCCTTGTGATATTTTTCATGGTTCTGGTTG-3' and 5'-  
454 CAACCAGAACCATGAAAAATATCACAAGGAGACACAGGC-3'. The PCR reaction was  
455 performed using NEB Phusion High-Fidelity DNA Polymerase (#M0530) with HF Buffer  
456 (#B0518) with 3% DMSO according to manufacturer's protocol. The BioRad T100  
457 Thermocycler was utilized for the mutagenesis reaction using the following cycling conditions:  
458 (step 1) 98°C, 30 sec; (step two) 25 cycles: 98°C, 10 sec; 68°C, 30 sec; 72°C, 6 min; (step three)  
459 72°C, 10 min. The template DNA was digested with DpnI (Thermo Scientific F541), and the  
460 mutagenized plasmid was ligated using T4 ligase (Thermo Scientific F541) and transformed into  
461 Stbl3 (Invitrogen C737303). Successful mutants were screened by growth on Kanamycin plates,  
462 and confirmed by Sanger sequencing (ACGT, Inc).

463 The pLenti-CD95L 5' fragment vector was created by subcloning the 5' fragment of the  
464 CD95L<sup>MUT</sup>NP ORF cDNA sequence (5'-  
465 GCTAGCCTGACTCACCAGCTGCCATGTAGCAGCCCTTCAATTACCCATATCCCAGATCTA  
466 CTGGGTGGACAGCAGTGCCAGCTCTCCCTGGGCCCTCCAGGCACAGTTCTTCCCTGTC  
467 CAACCTCTGTGCCAGAAGGCCTGGTCAAAGGAGGCCACCACCACCACCGCCACCGCCA  
468 CCACTACCACCTCCGCCGCCGCCCACTGCCTCCACTACCGCTGCCACCCCTGAA  
469 GAAGAGAGGGAACCACAGCACAGGCCTGTGTCTCCTTGCTCGAG-3') into the pLenti-GIII-  
470 CMV-RFP-2A-Puro vector. The pLenti-CD95L 3' fragment vector was created by subcloning  
471 the 3' half of the CD95L<sup>MUT</sup>NP ORF cDNA sequence (5'-

472 *GCTAGCCCTGGGGATGTTTCAGCTCTTCCACCTACAGAAGGAGCTGGCAGAACTCCGA*  
473 *GAGTCTACCAGCCAGATGCACACAGCATCATCTTTGGAGAAGCAAATAGGCCACCCCAGT*  
474 *CCACCCCCTGAAAAAAGGAGCTGAGGAAAGTGGCCCAITTAACAGGCAAGTCCAACTCA*  
475 *AGGTCCATGCCTCTGGAATGGGAAGACACCTATGGAATTGTCCTGCTTTCTGGAGTGAAG*  
476 *TATAAGAAGGGTGGCCTTGTGATCAATGAAACTGGGCTGTACTTTGTATATTCCAAAGTATA*  
477 *CTTCCGGGGTCAATCTTGCAACAACCTGCCCTGAGCCACAAGGTCTACATGAGGAACTC*  
478 *TAAGCGTCCCCAGGATCTGGTGATGATGGAGGGGAAGATGATGAGCTACTGCACTACTGG*  
479 *GCAGATGTGGGCCCAGCAGCTACCTGGGGGCAGTGTTCAATCTTACCAGTGCTGATCA*  
480 *TTTATATGTCAACGTATCTGAGCTCTCTCTGGTCAATTTGAGGAATCTCAGACGTTTTTCG*  
481 *GCTTATATAAGCTCTAAGAGAAGCACTTTGGGATCTCGAG-3')* into the pLenti-GIII-CMV-  
482 RFP-2A-Puro vector.

483

#### 484 **Overexpression of CD95L cDNAs**

485 All lentiviral constructs were generated in 293T cells as described previously (Putzbach et al.,  
486 2017). HeyA8 and MCF-7 (and all derivative cell lines) cells overexpressing wild type CD95L  
487 and mutant CD95L cDNAs were generated by seeding cells at 100,000 cells per well in a 6-well  
488 plate and infecting cells with lentivirus generated in 293T cells (500 µl viral supernatant per  
489 well) with 8 µg/ml Polybrene and subsequent centrifugation at 2700 rpm for 0.5-1 hour. Media  
490 was changed next day, and confluent wells were expanded to larger dishes. Selection was started  
491 on following day with 3 µg/ml puromycin. HCT116, HCT116 Drosha knockout, and HCT116  
492 Dicer knockout cells (Kim et al., 2016) overexpressing CD95L cDNAs were generated by  
493 seeding cells at 100,000 cells per well in a 24-well plate or 500,000 cells per well in a 6-well  
494 plate and infecting cells with lentivirus generated in 293T cells (100 µl virus per 24-well or 500  
495 µl per 6-well) in the presence of 8 µg/ml Polybrene. Media was changed the next day, and cells  
496 were selected with 3 µg/ml puromycin the following day. Infection with empty pLenti was  
497 always included as a control.

498 To assess toxicity of overexpressing CD95L cDNAs, cells infected with these constructs  
499 were plated in a 96-well plate 1 day after selection in the presence of puromycin (uninfected cells  
500 were all dead after 1 day in presence of puromycin); Cell confluency was assessed over time  
501 using the IncuCyte as described previously (Putzbach et al., 2017).

502 To assess overexpression of CD95L cDNAs in apoptosis-sensitive HeyA8 cells in **Figure**  
503 **1A**, infection with CD95L lentiviruses were done in 96-well plate using 50 µl of virus in the

504 presence of 20  $\mu$ M zVAD-fmk (Sigma-Aldrich #V116) and 8  $\mu$ g/ml Polybrene; media was  
505 changed next day in the presence of 20  $\mu$ M zVAD-fmk; 3  $\mu$ g/ml puromycin was added the  
506 following day. Infection with the CD95L constructs for the RT-qPCR and Western blot in  
507 **Figure 1B** were done in a 6-well plate in the presence of 20  $\mu$ M zVAD-fmk.

508 For the experiment in **Figure 3B**, **Figure 3 - figure supplement 1**, and **Figure 5G**, cells  
509 were reverse transfected in a 6-well plate; 100,000 cells were plated in wells with either the On-  
510 TargetPlus non-targeting siRNA (Dharmacon #D-001810-10) or siAGO2 pool (Dharmacon ##L-  
511 004639-00-0005) at 25 nM complexed with 1  $\mu$ l RNAiMax. After ~24 hrs, the cells were  
512 infected with either pLenti or different pLenti-CD95L WT or mutant constructs (500  $\mu$ l of viral  
513 supernatant [25% of total volume]) as described above. Next day, media was replaced, and  
514 cells were expanded to 10 cm plates. The following day, 3  $\mu$ g/ml puromycin was added. When  
515 puromycin selection was complete (one day later), 750-3000 cells were plated per well in a 96-  
516 well plate and put in the IncuCyte machine to assess cell confluency over time. When wt HeyA8  
517 cells were infected cells were plated one hour after infection and centrifugation. Puromycin was  
518 added to the wells 50 hrs after infection.

519

## 520 **CRISPR deletions**

521 We co-transfected a Cas9-expressing plasmid (Jinek et al., 2013) and two gRNAs that target  
522 upstream and downstream to delete an entire section of DNA as described previously (Putzbach  
523 et al., 2017). The gRNA scaffold was used as described (Mali et al., 2013). The gRNAs were  
524 designed using the algorithm found at <http://crispr.mit.edu>; only gRNAs with a score above 50  
525 were considered.

526 A deletion of 227 nucleotides in exon 4 of CD95 in MCF-7 cells ( $\Delta$ shR6, clone #21) was  
527 generated using gRNAs described previously (Putzbach et al., 2017). Deletion of this site results  
528 in a frame-shift mutation that causes a protein-level knock-out (Putzbach et al., 2017). PCR with  
529 flanking external primers (Fr: 5'-GGTGCATGCTGTGACTGTTG-3' and Rev: 5'-  
530 TTTAGCTTAAGTGGCCAGCAA-3') and internal primers (Fr primer and the internal Rev primer  
531 5'-AAGTTGGTTTACATCTGCAC-3') was used to screen for single cell clones that harbor a  
532 homozygous deletion.

533 The two sequences targeted by the flanking gRNAs for the deletion of the entire CD95 gene  
534 were 5'-GTCAGGGTTCGTTGCACAAA-3' and 5'-TGCTTCTTGGATCCCTTAGA-3'. For  
535 detection of the CD95 gene deletion, the flanking external primers were 5'-



536 *TGTTAATATAGCTGGGGCTATGC-3'* (Fr primer) and 5'-  
537 *TGGGACTCATGGGTTAAATAGAAT-3'* (Rev primer), and the internal reverse primer was 5'-  
538 *GACCAGTCTTCTCATTTCAGAGGT-3'*. After screening the clones, Sanger sequencing was  
539 performed to confirm the proper deletion had occurred.

540

#### 541 **Real-Time quantitative PCR**

542 The relative expression of specific mRNAs was quantified as described previously (Gao et al.,  
543 2018). The primer/probes purchased from ThermoFisher Scientific were GAPDH  
544 (Hs00266705\_g1), human CD95L (Hs00181226\_g1 and Hs00181225\_m1), human CD95  
545 (Hs00531110\_m1 and Hs00236330\_m1), and a custom primer/probe to detect the CD95L<sup>SIL</sup>  
546 mRNA (designed using the ThermoFisher Scientific custom design tool; assay ID: APNKTUD)  
547 and CD95L 5' fragment mRNA (designed using the ThermoFisher Scientific custom design tool;  
548 assay ID: APEPTMU).

549 Custom RT-qPCR probes designed to specifically detect small RNA species were used to  
550 detect CD95L fragments in **Figure 4G**. Abundant Ago bound CD95L small RNA sequences  
551 were identified from Drosha k.o. Ago pull-down sequencing data. sRNA sequences mapping to  
552 *FASLG* were sorted by their 3' end position. The number of small RNA reads terminating at the  
553 same nucleotide position were counted, and the most abundant sequences were selected for  
554 qPCR probe design from clusters 8 and 21. These probes were designed using ThermoFisher's  
555 Custom TaqMan Small RNA Assay Design Tool ([https://www.thermofisher.com/order/custom-](https://www.thermofisher.com/order/custom-genomic-products/tools/small-rna/)  
556 [genomic-products/tools/small-rna/](https://www.thermofisher.com/order/custom-genomic-products/tools/small-rna/)) to target the cluster 8 sequence (5'-  
557 *AAGGAGCTGGCAGAACTCCGAGA-3'*) and the cluster 21 sequence (5'-  
558 *TCAACGTATCTGAGCTCTCTC-3'*). Detection of these fragments involves a two-step  
559 amplification protocol used to detect microRNAs. In the first step, the High-Capacity cDNA  
560 reverse transcription kit is used to selectively reverse transcribe the two clusters to be quantified  
561 using specific primers and 100 ng RNA input. The cDNA was diluted 1:5. The qPCR reaction  
562 mixture is composed of the diluted cDNA, the custom probes, and the Taqman Universal PCR  
563 Master Mix (Applied Biosystems #43240018). Reactions were performed in triplicate. Ct values  
564 were determined using the Applied Biosystems 7500 Real Time PCR system with a thermocycle  
565 profile of 50°C for two min (step one), 95°C for 10 min (step two), and then 40 cycles of 95°C  
566 for 15 s (step three) and 60°C for 1 min (step four). The  $\Delta\Delta C_t$  values between the small RNA of



567 interest and the control were calculated to determine relative abundance of the small RNA.  
568 Samples were normalized to Z30 (ThermoFisher Scientific #4427975).

569

#### 570 **Western blot analysis**

571 Detection of human CD95, CD95L, AGO1 and AGO2 was done via Western blot as described  
572 previously (Putzbach et al., 2017).

573

#### 574 **CD95 surface staining**

575 Flow cytometry was used to quantify the level of membrane-localized CD95 as described  
576 previously (Putzbach et al., 2017).

577

#### 578 **Cell death quantification (DNA fragmentation) and ROS production**

579 The percent of subG1 nuclei (fragmented DNA) was determined by PI staining/flow cytometry  
580 as described previously (Putzbach et al., 2017). ROS production was quantified using the cell-  
581 permeable indicator 2',7'-dichlorodihydrofluorescein diacetate (ThermoFisher Scientific #D399)  
582 as previously described (Hadji et al., 2014).

583

#### 584 **Assessing cell growth and fluorescence over time**

585 After treatment/infection, 750 - 3000 cells were seeded in a 96-well plate at least in triplicate.  
586 Images were captured at indicated time points using an IncuCyte ZOOM live cell imaging  
587 system (Essen BioScience) with a 10x objective lens. Percent confluence and total fluorescent  
588 integrated intensity was calculated using the IncuCyte ZOOM software (version 2015A).

589

#### 590 **Infection of cells for Ago-pull down and small RNA-Seq analysis**

591 HeyA8  $\Delta$ shR6 clone #11 cells were seeded at 75,000 cells per well on 6-well plates, and the  
592 HCT116 and HCT116 Drosha knock-out cells were both seeded at 500,000 per well on 6-well  
593 plates. The HeyA8  $\Delta$ shR6 clone #11 cells were infected with 0.5 mL of empty pLenti or pLenti-  
594 CD95L-WT viral supernatant per well. The HCT116 and HCT116 Drosha knockout cells were  
595 infected with 0.5 mL empty pLenti or pLenti-CD95L<sup>MUT</sup>NP viral supernatant per well. Media  
596 was changed the next day and the cells were pooled and expanded to multiple 15 cm dishes.  
597 Selection with 3  $\mu$ g/mL puromycin began the following day. The next day, the HeyA8  $\Delta$ shR6  
598 clone #11 infected cells were seeded at 600,000 cells per dish in multiple 15 cm dishes; the

599 HCT116 and HCT116 Droscha knock-out cells were seeded at 5 million cells per dish in  
600 multiple 15 cm dishes. Two days later, each of the samples was pelleted and split in two: one  
601 pellet was lysed and processed for small RNA sequencing, and the other pellet was flash frozen  
602 in liquid nitrogen. The pellets were stored at -80°C until they could be used for the Ago pull-  
603 down experiment. The purpose of splitting the sample was so that we could compare the total  
604 cellular pool of small RNAs to the fraction that was bound to the RISC. This way, the processing  
605 CD95L-derived fragments from the full-length mRNA in the cytosol to the final mature RISC-  
606 bound form could be mapped. This was all done in duplicate.

607

### 608 **RNA-Seq analysis**

609 Total RNA was isolated using the miRNeasy Mini Kit (Qiagen, #74004) following the  
610 manufacturer's instructions. An on-column digestion step using the RNase-free DNase Set  
611 (Qiagen #79254) was included. Both small and large mRNA libraries were generated and  
612 sequenced as described previously (Putzbach et al., 2017). Reads were trimmed with TrimGalore  
613 and then aligned to the hg38 assembly of the human genome with Tophat. Raw read counts were  
614 assigned to genes using HTSeq and differential gene expression was analyzed with the R  
615 Bioconductor EdgeR package (Robinson, McCarthy, & Smyth, 2010).

616

### 617 **Ago pull down and RNA-Seq analysis of bound small RNAs**

618 Cell pellets were harvest at 50 hours after plating (122 hours after infection) and were flash  
619 frozen in liquid nitrogen. The pellets were stored at -80°C until ready for further processing.  
620 Between 10 and 25 x 10<sup>6</sup> cells were lysed in NP40 lysis buffer (20 mM Tris, pH 7.5, 150 mM  
621 NaCl, 2 mM EDTA, 1% (v/v) NP40, supplemented with phosphatase inhibitors) on ice for 15  
622 minutes. The lysate was sonicated 3 times for 30 s at 60% amplitude (Sonics, VCX130) and  
623 cleared by centrifugation at 12,000g for 20 minutes. AGO1-4 were pulled down by using 500 µg  
624 of Flag-GST-T6B peptide (Hauptmann et al., 2015) and with 60 µl anti-Flag M2 magnetic beads  
625 (Sigma-Aldrich) for 2 hrs at 4°C. The pull-down was washed 3 times in NP40 lysis buffer.  
626 During the last wash, 10% of beads were removed and incubated at 95°C for 5 minutes in 2x  
627 SDS-PAGE sample buffer. Samples were run on a 4-12% SDS-PAGE and transferred to  
628 nitrocellulose membrane. The pull-down efficiency was determined by immunoblotting against  
629 AGO1 (Cell Signaling #5053; RRID:AB\_10695871 and Abcam #98056; RRID:AB\_10680548)  
630 and AGO2 (Abcam #32381; RRID:AB\_867543). To the remaining beads 500 µl TRIzol reagent

631 were added and the RNA extracted according to the manufacturer's instructions. The RNA  
632 pellet was diluted in 20  $\mu$ l of water. The sample was split, and half of the sample was  
633 dephosphorylated with 0.5 U/ $\mu$ l of CIP alkaline phosphatase at 37°C for 15 min and  
634 subsequently radiolabeled with 0.5  $\mu$ Ci  $\gamma$ -<sup>32</sup>P-ATP and 1 U/ $\mu$ l of T4 PNK kinase for 20 min at  
635 37°C. The AGO1-4 interacting RNAs were visualized on a 15% urea-PAGE. The remaining  
636 RNA was taken through a small RNA library preparation as previously described (Hafner et al.,  
637 2012). Briefly, RNA was ligated with 3' adenylated adapters and separated on a 15% denaturing  
638 urea-PAGE. The RNA corresponding to insert size of 19-35 nt was eluted from the gel, ethanol  
639 precipitated followed by 5' adapter ligation. The samples were separated on a 12% Urea-PAGE  
640 and extracted from the gel. Reverse transcription was performed using Superscript III reverse  
641 transcriptase and the cDNA amplified by PCR. The cDNA was sequenced on Illumina HiSeq  
642 3000. Adapter sequences: Adapter 1 – NNTGACTGTGGAATTCTCGGGTGCCAAGG;  
643 Adapter 2 – NNACACTCTGGAATTCTCGGGTGCCAAGG, Adapter 3 –  
644 NNACAGAGTGGAATTCTCGGGTGCCAAGG, Adapter 4 –  
645 NNGCGATATGGAATTCTCGGGTGCCAAGG, Adapter 47 –  
646 NNTCTGTGTGGAATTCTCGGGTGCCAAGG, Adapter 48 –  
647 NNCAGCATTGGAATTCTCGGGTGCCAAGG, Adapter 49 –  
648 NNATAGTATGGAATTCTCGGGTGCCAAGG, Adapter 50 –  
649 NNTCATAGTGGAATTCTCGGGTGCCAAGG. RT primer sequence:  
650 GCCTTGGCACCCGAGAATTCCA; PCR primer sequences:  
651 CAAGCAGAAGACGGCATAACGAGATCGTGATGTGACTGGAGTTCCTTGGCACCCGAG  
652 AATTCCA. To identify CD95L-derived small RNAs among the sequenced reads, a BLAST  
653 database was generated from each set of reads, and blastn was used to query the CD95L ORF  
654 (derived from NM\_000639.2) against reads from cells infected with pLenti-CD95L and to query  
655 the CD95L<sup>MUT</sup>NP ORF sequence against reads from cells infected with CD95L<sup>MUT</sup>NP. The only  
656 reads considered further were those matching a CD95L sequence with an e-value of less than  
657 0.05 and 100% identity across the entire length of the read. This resulted in the loss of a few  
658 reads less than 19/20 nt in length. The filtered BLAST hits were converted to a bed formatted  
659 file, describing the locations of reads relative to the relevant CD95L sequence, and the R  
660 package Sushi was used to plot the bed files and generate Figures 4B-E.

661

662 **Assessing toxicity of CD95L-derived small RNAs**

663 To determine whether guide RNAs derived from the over-expressed CD95L mRNA could  
664 evoke toxicity, the small CD95L-derived RNA reads (corresponding to different clusters shown  
665 in **Figure 4C**) bound to AGO from the HCT116 Drosha knock-out cells were converted to  
666 siRNAs. First, all reads less than 18 nucleotides were filtered out, as these do not efficiently  
667 incorporate into the RISC. siRNAs were designed with antisense strands fully complementary to  
668 the CD95L-derived sequences that mapped to areas of the CD95L mRNA secondary structure  
669 (**Figure 4 - figure supplement 1A**) that are predicted to form duplexes. These sequences were  
670 designed as 19 nucleotide oligos with a 3' deoxy AA. The complementary sense strand was  
671 designed with a 3' deoxy TT and 2'-O-methylation at the first two positions to prevent its  
672 incorporation into the RISC. These oligos were ordered from IDT and annealed to form the final  
673 siRNAs. The sequences of the antisense strands (corresponding to the CD95L mRNA-derived  
674 cluster fragments) were as follows: 5'-AUUGGGCCUGGGGAUGUUU-3' (c7/1), 5'-  
675 CCUGGGGAUGUUUCAGCUC-3' (c7/2), 5'-CCAACUCAAGGUCCAUGCC-3' (c11), 5'-  
676 AACUGGGCUGUACUUUGU-3' (c15/1), 5'- AACUGGGCUGUACUUUGUA-3' (c15/2),  
677 5'- CAACAACCUGCCCCUGAGC-3' (c16/1), 5'- AACUCUAAGCGUCCCCAGG-3' (c16/2),  
678 5'- UCAACGUAUCUGAGCUCUC-3' (c21), and 5'- AAUCUCAGACGUUUUUCGG-3'  
679 (c22).

680 These eight siRNAs were reverse transfected into HeyA8, H460, M565, and 3LL cells using  
681 RNAiMAX transfection reagent (ThermoFisher Scientific) at 10 nM in triplicate as previously  
682 described (Murmah, Gao, et al., 2018). The non-targeting (NT) and siL3 siRNAs, as described  
683 previously (Putzbach et al., 2017), were used as a negative and positive control, respectively.  
684 Cell death was quantified via ATP release 96 hours after transfection using CellTiter-Glo  
685 (Promega). The % viability was calculated in relation to the RNAiMAX-only treatment structure  
686 (**Figure 4 - figure supplement 1B**).

687 To analyze the distribution of seed toxicity of all the small RNAs bound to RISC in wt and  
688 Drosha k.o. cells, read-based Ago pull down data were used. 6mer seed sequences (position 2 -  
689 7) were extracted from all unique sequences present in wt or Drosha k.o. cells. The  
690 corresponding average 6mer seed toxicity (between HeyA8 and H460 cells) was added for each  
691 unique sequence. These sequences were aggregated into six groups according to their different  
692 levels of seed toxicity (numbers shown are percentage cell viability): (1) <20%; (2) 20~40%; (3)  
693 40~60%; (4) 60~80%; (5) 80~100%; (6) >100%. Total reads (RPM) in each seed toxicity group  
694 were added up and plotted (**Figure 5F**). In addition, the distribution of seed toxicity of all

695 miRNAs bound to the RISC in wt and Drosha k.o. cells were analyzed in a similar manner  
696 except that only reads that could be aligned to miRNAs were included.

697

#### 698 **Analysis of the CD95L<sup>SIL</sup> mutant's theoretical toxicity**

699 All possible 6mers that could be generated through processing of the 846 nt sequence of either  
700 CD95L WT or CD95L<sup>SIL</sup> were extracted in R, a total of 841 possible 6mers. The corresponding  
701 HeyA8 viability data from the 4096 6mer seed screen was joined to the corresponding theoretical  
702 CD95L 6mers (Gao et al., 2018). A density plot was generated from the viability data. R  
703 packages used: dplyr, data.table, ggplot2. A Two-sample Kolmogorov-Smirnov test was  
704 performed in R to determine statistical significance.

705

#### 706 **Analysis of RISC bound small RNAs derived from coding genes.**

707 All reads from Ago pull downs of Drosha k.o. samples with either pLenti or CD95L over-  
708 expressed were aligned to the hg38 genome as previously described (Putzbach et al., 2017) (see  
709 **Figure 5 - figure supplement 2**). Reads were extracted that aligned uniquely to the genome for  
710 each pair of replicates, and pooled into one set per sample type (CD95L or pLenti). Identical  
711 reads were collapsed and counted and reads < 15 bp or > 50 bp in length were eliminated, as well  
712 as reads containing N's. The number of reads found at least 10 times across each pair of replicate  
713 samples were 10,839 for CD95L expressing cells and 10,617 for pLenti infected cells. The  
714 results were filtered so that only 100% matches across the entire length of the read were counted,  
715 in the direction of transcription. The start position was reported for each uniquely mapping,  
716 highly abundant ( $\geq 10$  copies) read. The number of such unique start positions was counted to  
717 obtain a putative number of stacks for each transcript. Any gene with at least one stack was  
718 counted, and the ten genes with the highest number of stacks are plotted in **Figure 5B** (and  
719 **Figure 5 - figure supplement 5B**). Once the ten genes that contained the most RISC bound reads  
720 in the CD95L expressing cells were identified, a single transcript was pulled out for each gene.  
721 In each case the transcript with the longest 3'UTR was used: 1 - ZC3HAV1  
722 (ENST00000242351), 2 - FAT1 (ENST00000441802), 3 - SRRM2 (ENST00000301740), 4 -  
723 TNFRSF10D (ENST00000312584), 5 - PABPC1 (ENST00000318607), 6 - CCND1  
724 (ENST00000227507), 7 - MYC (ENST00000621592), 8 - YWHAG (ENST00000307630), 9 -  
725 DKK1 (ENST00000373970), 10 - AKAP12 (ENST00000402676). These reads were blasted  
726 against all of the raw RNA-seq data. Only 100% matches across the entire length of the read

727 were considered, in the direction of transcription, but all reads that matched the transcript at  
728 that stringency were plotted, regardless of their individual abundance or uniqueness, with each  
729 individual blue line representing an individual read, with its length in the plot proportional to the  
730 read length.

731

### 732 **Determine the abundance of the coding genes that give rise to Ago-bound reads.**

733 To determine the abundance of coding genes with Ago bound reads (*Figure 5C*), we isolated all  
734 genes that had an RPKM of at least 10 using uniquely mapped reads from a conventional long  
735 RNA-Seq data set. These resulted in 4262 genes in the CD95L expressing HCT116 Droscha k.o.  
736 cells and 4256 genes in the pLenti infected cells. Both data sets were very similar with >90%  
737 overlap of the two sets.

738

### 739 **Statistical analyses**

740 Continuous data were summarized as means and standard deviations (except for all IncuCyte  
741 experiments where standard errors are shown) and dichotomous data as proportions. Continuous  
742 data were compared using t-tests for two independent groups and one-way ANOVA for 3 or  
743 more groups. For evaluation of continuous outcomes over time, two-way ANOVA was used with  
744 one factor for the treatment conditions of primary interest and a second factor for time treated as  
745 a categorical variable to allow for non-linearity.

746 The effects of treatment on wild-type versus Droscha knock-out cells were statistically  
747 assessed by fitting regression models that included linear and quadratic terms for value over  
748 time, main effects for treatment and cell type, and two- and three-way interactions for treatment,  
749 cell-type and time. The three-way interaction on the polynomial terms with treatment and cell  
750 type was evaluated for statistical significance since this represents the difference in treatment  
751 effects over the course of the experiment for the varying cell types.

752 GSEA used in *Figure 2B* was performed using the GSEA v2.2.4 software from the Broad  
753 Institute ([www.http://software.broadinstitute.org/gsea](http://software.broadinstitute.org/gsea)); 1000 permutations were used. The  
754 Sabatini gene lists were set as custom gene sets to determine enrichment of survival genes versus  
755 the nonsurvival control genes in downregulated genes from the RNA-Seq data as done  
756 previously (Putzbach et al., 2017); p-values below 0.05 were considered significantly enriched.  
757 Genes with an average normalized read expression (across both pair of duplicates) below 3 were  
758 excluded so as to only include genes that are truly expressed. The GO enrichment analysis shown



759 in **Figure 2D** was performed with all genes that after alignment and normalization were found  
760 to be at least 1.5 fold downregulated with an adjusted p-value of <0.05 using the software  
761 available on [www.Metasplice.org](http://www.Metasplice.org) and default running parameters. The other data sets used in this  
762 analysis (HeyA8 cells transfected with a toxic siRNA targeting CD95L siL3 and 293T infected  
763 with toxic shRNAs targeting CD95L shL1 and shL3 and HeyA8 cells infected with a toxic  
764 shRNA targeting CD95 shR6) were previously described (Putzbach et al., 2017).

765 All statistical analyses were conducted in Stata 14 or R 3.3.1.

766

#### 767 **Data availability**

768 RNA sequencing data generated for this study is available in the GEO repository: GSE103631  
769 (<https://www.ncbi.nlm.nih.gov/geo/query/acc.cgi?acc=GSE103631>, reviewer access token:  
770 etgbqyaenvirjqn) and GSE114425  
771 (<https://www.ncbi.nlm.nih.gov/geo/query/acc.cgi?acc=GSE114425>, reviewer access token:  
772 edgdoaojberbyr).

773

774

#### 775 **Acknowledgements**

776 We are grateful to Siquan Chen for testing small CD95L-derived sRNAs. M.H. and A.A.S were  
777 supported by the Intramural Research Program of NIAMS. A.A.S. acknowledges support by the  
778 Swedish Research Council postdoctoral fellowship. This work was funded by training grant  
779 T32CA009560 (to W.P. and A.H.K.), R50CA221848 (to E.T.B.), and R35CA197450 (to  
780 M.E.P.).

781

#### 782 **Competing financial interests**

783 The authors declare no competing financial interests. <sup>[1]</sup><sub>SEP</sub>

784

785 **Figure legends**

786

787 **Figure 1.**

788 **The CD95L RNA is toxic to cells.**

789 (A) *Left*: Schematic of the different CD95L mutants used. *Right*: Percent cell confluence over  
790 time of HeyA8 parental cells in the absence (*left panel*) or in the presence of 20  $\mu$ M zVAD-fmk  
791 (*center panel*), or CD95 k.o. cells (*right panel*) after expression of CD95L constructs. Data are  
792 representative of one to three independent experiments. Values were calculated from samples  
793 done in triplicate or quadruplicate shown as mean  $\pm$  SE. (B) *Left*: Western blot analysis of  
794 HeyA8 cells overexpressing different CD95L mutant RNAs. Cells expressing CD95L<sup>MUT</sup> or  
795 CD95L were pretreated with 20  $\mu$ M zVAD-fmk. Note the small amount of truncated CD95L in  
796 cells infected with CD95L MUT-NP does not have CD95 binding activity. Very similar data  
797 were obtained when the constructs were expressed in either CD95 k.o. HeyA8 cells (clone #11)  
798 or NB-7 cells, which lack expression of caspase-8, both without treatment with zVAD (data not  
799 shown). *Right*: RT-qPCR analysis for CD95L of the same samples. Data are representative of  
800 two independent experiments. Each bar represents mean  $\pm$  S.D. of three replicates. (C, D)  
801 Quantification of cell death (C) and ROS production (D) in CD95 k.o. HeyA8 cells (clone #11)  
802 expressing either pLenti (v) or pLenti-CD95L (L) at different time points (days after infection).  
803 Data are representative of two independent experiments. Each bar represents mean  $\pm$  SE of three  
804 replicates. \* p<0.05, \*\* p<0.001, \*\*\* p<0.0001, unpaired t-test. (E) Confluency over time of the  
805 MCF-7 complete CD95 k.o. FA4 clone (right) or a MCF-7 clone #21 in which we deleted the  
806 shR6 site resulting in an out-of-frame shift after infection with either pLenti vector control (vec)  
807 or wt CD95L. Data are representative of two independent experiments. Each data point  
808 represents mean  $\pm$  SE of three replicates.

809

810 **Figure 1 - figure supplement 1.**

811 **Generation of complete CD95 k.o. MCF-7 cells.**

812 (A) Schematic of the genomic locations and sequences of the gRNAs used to excise the entire  
813 CD95 gene in MCF-7 cells. PAM site is underlined. (B) PCR with flanking (*top panels*) and  
814 internal (*bottom panels*) primers used to confirm the absence of the CD95 gene in MCF-7 clones.  
815 Parental (Par.) cells and three clones infected with Cas9 only (Cas9) and two homozygous  
816 complete CD95 k.o. clones (F2 and FA4) are shown. (C) RT-qPCR analysis of the indicated  
817 clones using primers spanning either exon 1/2 or exon 2/3 of the CD95 gene. (D) Surface  
818 staining for CD95 of one wt and one k.o. clone. (E) Western blot analysis of all clones.

819

820 **Figure 1 - figure supplement 2.**

821 **Mutation of the alternative start codon in CD95L<sup>MUT</sup>NP construct.**

822 (A) *Left*: Schematic of the different CD95L mutants used. For the M86I mutant protein the point  
823 mutation on the DNA level is in parentheses. (B) Western blot analysis of HeyA8 CD95 k.o.  
824 cells overexpressing different CD95L mutants. Note, for unknown reasons in this experiment  
825 expression of the CD95L<sup>MUT</sup>NP protein was more efficient than in the experiment shown in  
826 Figure 1B. (C) Percent cell confluence over time of HeyA8 CD95 k.o. (cl #11) cells after  
827 expression of the different CD95L constructs. Values were calculated from samples plated in  
828 triplicate shown as mean  $\pm$  SE.

829

830 **Figure 1 - figure supplement 3.**

831 **Toxicity of CD95L mRNA is independent of CD95L protein expression.**



832 (A) Schematic showing the positions of the silent mutation of the CD95L<sup>SIL</sup> compared to wild  
833 type CD95L (mutations highlighted in blue). (B) Percent cell confluence over time of HeyA8  
834 CD95 k.o. cells over-expressing empty pLenti vector (vec), wild-type CD95L (from two  
835 separately cloned viruses), or the CD95L<sup>SIL</sup>. (C) RT-qPCR analysis and Western blot (*inset*) of  
836 wild type CD95L and CD95L<sup>SIL</sup> mutant mRNAs in the over-expressing cells shown in B. (D)  
837 Probability density plot comparing the toxicity of all possible 6mer seeds located in either the  
838 WT or SIL CD95L mRNA. p-value was calculated using a two-sample two-sided K-S test.

839

840 **Figure 2.**

841 **Toxicity induced by CD95L overexpression is reminiscent of DISE.**

842 (A) Phase-contrast images of HeyA8 and HeyA8 CD95 k.o. cells after infection with pLKO-  
843 shScr/shL3 or pLenti (vec)/pLenti-CD95L, respectively, at the indicated time point. (B) Gene set  
844 enrichment analysis for the 1846 survival genes (*top panel*) and the 416 nonsurvival genes  
845 (*bottom panel*) identified in the Sabatini study (Putzbach et al., 2017; Wang et al., 2015) of  
846 mRNAs downregulated in CD95L expressing HeyA8 CD95 k.o. cells compared to HeyA8 CD95  
847 k.o. cells infected with pLenti virus. p-values indicate the significance of enrichment. (C)  
848 Common genes downregulated in all RNA-Seq experiments from (HeyA8) cells treated with  
849 either one of four si/shRNAs (Putzbach et al., 2017) derived from either CD95 or CD95L (see  
850 **Figure 2D**) and cells overexpressing CD95L ORF as described in B. (D) Metascape analysis of 5  
851 RNA Seq data sets analyzed. The boxed GO term clusters were highly enriched in all 5 data sets.

852

853 **Figure 3.**

854 **Small RNAs generated in cells expressing CD95L mRNA are loaded into the RISC.**

855 (A) Percent cell confluence over time of HCT116 parental (*left*) or Drosha k.o. (*right*) cells after  
856 infection with CD95<sup>MUT</sup>NP. Data are representative of three independent experiments. Each data  
857 point represents the mean  $\pm$  SE of three replicates. *Inset*: Phase contrast images of Drosha k.o.  
858 cells 9 days after infection with either empty vector or CD95L<sup>MUT</sup>NP. (B) Percent cell  
859 confluence of HeyA8 CD95 k.o. cells transfected with either non-targeting siRNA (siCtr) or a  
860 pool of 4 siRNAs targeting AGO2 following subsequent infection with either empty pLenti (vec)  
861 or pLenti CD95L. *Inset*: Western blot showing successful knock-down of human AGO2. (C)  
862 *Top*: autoradiograph on RNAs pulled down with the Ago binding peptide. *Bottom*: Western blot  
863 analysis of pulled down Ago proteins. v, pLenti; L, pLenti-CD95L expressing cells. (D) Pie  
864 charts showing the relative ratio of small RNAs pulled down with the Ago proteins in wt and  
865 Drosha k.o. cells. Depicted are all the amounts of all small RNAs that contributed at least 0.01%  
866 to the total RNA content. Only in the Drosha k.o. cells was a significant amount of CD95L  
867 derived Ago bound reads found. They represented the 75th most abundant small RNA species  
868 (arrow). The average number of total sequenced reads (of two duplicates) are shown for each  
869 condition. (E) *Top*: Number of reads (normalized per million) of the top six most abundant small  
870 RNAs in the RISC of either HCT116 wt-pLenti or -pLenti-CD95L cells. *Bottom*: Number of  
871 reads (per million) of the top five genes with small RNAs most abundant in the RISC of either  
872 HCT116 Drosha k.o. pLenti (v), or -pLenti-CD95L cells and of CD95L derived. Note: miR-21 is  
873 not included as it is already shown in the top row. Bottom right panel: Abundance of Ago bound  
874 CD95L derived small RNAs. Shown in all panels is the abundance of RNAs in the four samples.  
875 Rep 1 and rep 2, replicate 1 and 2.

876

877 **Figure 3 - figure supplement 1.**

878 **All CD95L mRNA mutants are toxic through RNAi.**

879 (A) Percent cell confluence of HeyA8 CD95 k.o. cells (cl #11) transfected with either non-  
880 targeting siRNAs (siCtr) or a pool of 4 siRNAs targeting AGO2 following subsequent infection  
881 with either empty pLenti (vec), pLenti CD95L<sup>MUT</sup>NP (left), or pLenti CD95L<sup>SIL</sup> (right). (B)  
882 Percent cell confluence of parental HeyA8 cells transfected with either a pool of 4 non-targeting  
883 siRNA (siCtr) or a pool of 4 siRNAs targeting AGO2 following subsequent infection with either  
884 empty pLenti (vec), pLenti CD95L<sup>WT</sup> (left), or pLenti CD95L<sup>SIL</sup> (right). (C) Percent cell  
885 confluence of parental HeyA8 cells transfected with either a pool of 4 non-targeting siRNA  
886 (siCtr) or a pool of 4 siRNAs targeting AGO2 following subsequent infection with either empty  
887 pLenti (vec), or pLenti CD95L<sup>MUT</sup>NP. In A cells were plated after puromycin selection. In B and  
888 C cells were plated directly after viral infection and puromycin was added 50 hours after  
889 infection (arrow).

890

#### 891 **Figure 4**

#### 892 **The entire CD95L mRNA gives rise to small RNAs that bind to the RISC.**

893 (A) Length distribution of CD95L derived reads in various analyses. (B, C) Read alignment with  
894 CD95L<sup>MUT</sup>NP ORF of analyses of small RNAs pulled down with Ago proteins from HCT116 wt  
895 (B, top) and Drosha k.o. (B, bottom) cells and of total small RNAs from HCT116 Drosha k.o.  
896 cells (C) after infection with CD95L<sup>MUT</sup>NP. (D, E) Read alignment with wt CD95L ORF of  
897 analyses of small RNAs pulled down with Ago proteins (D) or total small RNAs (E) from  
898 HeyA8 CD95 k.o. cells after infection with wt CD95L. (F) Percent cell confluence over time of  
899 HCT116 parental (*top*) or Dicer k.o. (clone #43) (*bottom*) cells after infection with CD95<sup>MUT</sup>NP.  
900 (Dicer k.o. clone #45, gave a similar result, data not shown). Data are representative of two  
901 independent experiments. Each data point represents the mean  $\pm$  SE of three replicates. (G) RT-  
902 qPCR analysis of clusters 8 and 21 in HCT116 parental, Dicer k.o. (clone #43), and Drosha k.o.  
903 cells after infection with CD95<sup>MUT</sup>NP. Each bar represents mean  $\pm$  S.D. of three replicates. v,  
904 vector, L, CD95L expressing cells.

905

#### 906 **Figure 4 - figure supplement 1**

#### 907 **Predicted secondary structure of CD95L ORF and toxicity of CD95L-derived small RNAs** 908 **after conversion to siRNAs.**

909 (A) The CD95L<sup>MUT</sup>NP RNA was subjected to a RNA secondary structure analysis  
910 (<http://rna.tbi.univie.ac.at>) using default settings. The locations of 22 reads representative of the  
911 22 read clusters are shown. Regions with potential duplex formation are boxed. The  
912 oligonucleotides that were found to be toxic when expressed as siRNAs are circled. (B) Toxicity  
913 of the eight siRNAs designed using the CD95L-derived small RNA fragments bound to Ago as  
914 the antisense strand sequences 96 hours post-transfection in the indicated cell lines. Each data  
915 point represents the mean  $\pm$  SE of three replicates.

916

#### 917 **Figure 4 - figure supplement 2**

#### 918 **CD95L fragments are less toxic than full length CD95L mRNA.**

919 (A) Schematic of the different CD95L fragments used. (B) *Left*: Western blot analysis of HeyA8  
920 CD95 k.o. cells overexpressing different CD95L mutant RNAs. *Right*: RT-qPCR analysis for  
921 CD95L of the same samples using primers detecting either the 5' or the 3' half of the mRNA.  
922 Data are representative of two independent experiments. Each bar represents mean  $\pm$  S.D. of  
923 three replicates. (C) Percent cell confluence over time of HeyA8 CD95 k.o. cells after expressing  
924 the CD95L mutant or fragments. Data are representative of two independent experiments. Values  
925 were calculated from samples done in triplicate shown as mean  $\pm$  SE. (D) *Left*: Western blot  
926 analysis of HCT116 Drosha k.o. cells overexpressing different CD95L mutant RNAs. *Right*: RT-

927 qPCR analysis for CD95L of the same samples using primers detecting either the 5' or the 3'  
928 half of the mRNA. Data are representative of two independent experiments. Each bar represents  
929 mean  $\pm$  S.D. of three replicates. (E) Percent cell confluence over time of HCT116 Drosha k.o.  
930 cells after expressing the CD95L mutant or fragments. Data are representative of two  
931 independent experiments. Values were calculated from samples done in triplicate shown as mean  
932  $\pm$  SE.

933

### 934 **Figure 5**

#### 935 **Endogenous mRNAs are processed and loaded into the RISC.**

936 (A) Length distribution of reads derived from five of the top ten most abundant genes loaded into  
937 RISC of CD95L expressing HCT116 Drosha k.o. cells. The numbers in parentheses indicate the  
938 ranking in the top ten most abundant genes with Ago bound reads. (B) Alignment of the reads  
939 from the 5 genes shown in A with blue lines representing the mapped positions of the reads, and  
940 the height of the stacks representing the number of reads at each location. Small RNAs pulled  
941 down with Ago proteins (top) or total small RNAs (bottom) from HCT116 and Drosha k.o. cells  
942 after infection with wt CD95L. \*This stack contains 14899 reads of which 3000 were randomly  
943 chosen and plotted. (C) All 4262 genes in HCT116 Drosha k.o. cells expressing CD95L ranked  
944 according to highest expression with more than 10 reads expressed as reads per kb per million  
945 (RPKM). The abundance of the 6 genes shown in A and B is labeled. (D) Genes ranked  
946 according to highest abundance in the RISC of Drosha k.o. cells. Reads derived from the five  
947 genes in A are labeled as well as the location of the reads derived from CD95L. (E) Percent cell  
948 confluence over time of parental HCT116 and Drosha k.o. cells. (F) Average seed toxicity of all  
949 Ago-bound miRNAs and non-miRNAs (other RNAs) in parental HCT116 and Drosha k.o. cells.  
950 Reads are shown as reads per million (RPM). Chi squared test was used to calculate p-value. (G)  
951 Percent cell confluence over time of Drosha k.o. HCT116 cells 24 hours after transfection with  
952 25 nM of either nontargeting SMARTpool (siCtr) or AGO2 SMARTpool siRNAs. Each data  
953 point represents mean  $\pm$  SE of three replicates. The experiment is representative of three  
954 biological repeats.

955

#### 956 **Figure 5 - figure supplement 1**

##### 957 **Endogenous mRNAs are processed and loaded into the RISC - additional genes**

958 (A) Length distribution of reads derived from 5 of the top ten most abundant genes loaded into  
959 RISC of CD95L expressing HCT116 Drosha k.o. cells. The numbers in brackets indicate the  
960 ranking in the top ten most abundant genes with Ago bound reads. (B) Alignment of the reads  
961 from the 5 genes shown in A with their respective mRNAs derived from small RNAs pulled  
962 down with Ago proteins (top) or total small RNAs (bottom) from HCT116 and Drosha k.o. cells  
963 after infection with wt CD95L.

964

#### 965 **Figure 5 - figure supplement 2**

##### 966 **Mapping of Ago bound reads from five processed genes to the human genome.**

967 Alignment of all reads derived from the 5 genes shown in *Figure 5A* and *B* with the human  
968 genome. Shown are all 8 tracks of HCT116 wt and HCT116 Drosha k.o. cells infected with  
969 either pLenti control vector (vec) or pLenti-CD95L in duplicate. For each of the genes the Y axis  
970 was fixed to the same scale.

971

#### 972 **Figure 5 - figure supplement 3**

973 **Genes with multiple reads bound to Ago proteins are involved in cell growth and protein**  
974 **translation.**

975 (A) All 558 genes that were processed similar to CD95L and had reads bound to Ago proteins  
976 were subjected to a DAVID GO analysis. Shown are all significantly enriched gene clusters. The  
977 top two clusters (dark green) stood out with very low p-values of enrichment. Clusters  
978 highlighted in green are connected to cell proliferation (cell cycle, anti-apoptosis or protein  
979 translation). (B) All 5629 genes with Ago bound reads (10 or more counts) ranked according  
980 highest abundance. The ranked positions of the mRNAs of ribosomal proteins are indicated in  
981 red.

982

983 **Supplementary Videos and files:**

984

985 **Video 1: CD95 k.o. HeyA8 cells (clone #11) infected with pLenti control virus.**

986 **Video 2: CD95 k.o. HeyA8 cells (clone #11) infected with pLenti-CD95Lvirus.**

987 **Video 3: HeyA8 cells infected with pLKO-shScr.**

988 **Video 4: HeyA8 cells infected with pLKO-shL3.**

989

990 **Supplementary File 1:**

991 Reads from coding and noncoding genes pulled-down with Ago proteins in HCT116 Droscha k.o.  
992 pLenti-CD95L cells. Tab 1: Reads from all genes; Tab 2: Reads from processed protein coding  
993 genes (>10 reads), Tab 3: Reads from unprocessed protein coding genes (>10 reads).

994

995

## References

- 996  
997  
998 Algeciras-Schimmich, A., Shen, L., Barnhart, B. C., Murmann, A. E., Burkhardt, J. K., & Peter, M.  
999 E. (2002). Molecular ordering of the initial signaling events of CD95. *Mol Cell Biol*,  
1000 22(1), 207-220.
- 1001 Banez-Coronel, M., Porta, S., Kagerbauer, B., Mateu-Huertas, E., Pantano, L., Ferrer, I., . . .  
1002 Marti, E. (2012). A pathogenic mechanism in Huntington's disease involves small  
1003 CAG-repeated RNAs with neurotoxic activity. *PLoS Genet*, 8(2), e1002481.  
1004 doi:10.1371/journal.pgen.1002481
- 1005 Burroughs, A. M., Ando, Y., de Hoon, M. J., Tomaru, Y., Suzuki, H., Hayashizaki, Y., & Daub, C.  
1006 O. (2011). Deep-sequencing of human Argonaute-associated small RNAs provides  
1007 insight into miRNA sorting and reveals Argonaute association with RNA fragments  
1008 of diverse origin. *RNA Biol*, 8(1), 158-177.
- 1009 Ceppi, P., Hadji, A., Kohlhapp, F., Pattanayak, A., Hau, A., Xia, L., . . . Peter, M. E. (2014). CD95  
1010 and CD95L promote and protect cancer stem cells. *Nature Commun*, 5, 5238.
- 1011 Elkayam, E., Faehnle, C. R., Morales, M., Sun, J., Li, H., & Joshua-Tor, L. (2017). Multivalent  
1012 Recruitment of Human Argonaute by GW182. *Mol Cell*, 67(4), 646-658 e643.  
1013 doi:10.1016/j.molcel.2017.07.007
- 1014 ELOjeimy, S., McKillop, J. C., El-Zawahry, A. M., Holman, D. H., Liu, X., Schwartz, D. A., . . .  
1015 Norris, J. S. (2006). FasL gene therapy: a new therapeutic modality for head and  
1016 neck cancer. *Cancer gene therapy*, 13(8), 739-745. doi:10.1038/sj.cgt.7700951
- 1017 Friesen, C., Fulda, S., & Debatin, K. M. (1999). Cytotoxic drugs and the CD95 pathway.  
1018 *Leukemia*, 13(11), 1854-1858.
- 1019 Fu, Q., Fu, T. M., Cruz, A. C., Sengupta, P., Thomas, S. K., Wang, S., . . . Chou, J. J. (2016).  
1020 Structural Basis and Functional Role of Intramembrane Trimerization of the  
1021 Fas/CD95 Death Receptor. *Mol Cell*, 61(4), 602-613.  
1022 doi:10.1016/j.molcel.2016.01.009
- 1023 Gao, Q. Q., Putzbach, W., Murmann, A. E., Chen, S., Ambrosini, G., Peter, J. M., . . . Peter, M. E.  
1024 (2018). 6mer seed toxicity in tumor suppressive miRNAs. *Nature Comm*, In press,  
1025 preprint at: <https://doi.org/10.1101/284406>.
- 1026 Hadji, A., Ceppi, P., Murmann, A. E., Brockway, S., Pattanayak, A., Bhinder, B., . . . Peter, M. E.  
1027 (2014). Death induced by CD95 or CD95 ligand elimination. *Cell Reports*, 10, 208-  
1028 222.
- 1029 Hafner, M., Renwick, N., Farazi, T. A., Mihailovic, A., Pena, J. T., & Tuschl, T. (2012). Barcoded  
1030 cDNA library preparation for small RNA profiling by next-generation sequencing.  
1031 *Methods*, 58(2), 164-170. doi:10.1016/j.ymeth.2012.07.030
- 1032 Hamilton, A. J., & Baulcombe, D. C. (1999). A species of small antisense RNA in  
1033 posttranscriptional gene silencing in plants. *Science*, 286(5441), 950-952.
- 1034 Hansen, T. B., Veno, M. T., Jensen, T. I., Schaefer, A., Damgaard, C. K., & Kjems, J. (2016).  
1035 Argonaute-associated short introns are a novel class of gene regulators. *Nature*  
1036 *communications*, 7, 11538. doi:10.1038/ncomms11538
- 1037 Hauptmann, J., Schraivogel, D., Bruckmann, A., Manickavel, S., Jakob, L., Eichner, N., . . .  
1038 Meister, G. (2015). Biochemical isolation of Argonaute protein complexes by Ago-  
1039 APP. *Proc Natl Acad Sci U S A*, 112(38), 11841-11845.  
1040 doi:10.1073/pnas.1506116112



- 1041 Hyer, M. L., Voelkel-Johnson, C., Rubinchik, S., Dong, J., & Norris, J. S. (2000). Intracellular  
1042 Fas ligand expression causes Fas-mediated apoptosis in human prostate cancer cells  
1043 resistant to monoclonal antibody-induced apoptosis. *Mol Ther*, 2(4), 348-358.
- 1044 Jinek, M., East, A., Cheng, A., Lin, S., Ma, E., & Doudna, J. (2013). RNA-programmed genome  
1045 editing in human cells. *Elife*, 2, e00471. doi:10.7554/eLife.00471
- 1046 Kim, Y. K., Kim, B., & Kim, V. N. (2016). Re-evaluation of the roles of DROSHA, Exportin 5,  
1047 and DICER in microRNA biogenesis. *Proc Natl Acad Sci U S A*, 113(13), E1881-1889.  
1048 doi:10.1073/pnas.1602532113
- 1049 Liu, J., Carmell, M. A., Rivas, F. V., Marsden, C. G., Thomson, J. M., Song, J. J., . . . Hannon, G. J.  
1050 (2004). Argonaute2 is the catalytic engine of mammalian RNAi. *Science*, 305(5689),  
1051 1437-1441.
- 1052 Lu, J., Getz, G., Miska, E. A., varez-Saavedra, E., Lamb, J., Peck, D., . . . Golub, T. R. (2005).  
1053 MicroRNA expression profiles classify human cancers. *Nature*, 435(7043), 834-838.
- 1054 Mali, P., Yang, L., Esvelt, K. M., Aach, J., Guell, M., DiCarlo, J. E., . . . Church, G. M. (2013). RNA-  
1055 guided human genome engineering via Cas9. *Science*, 339(6121), 823-826.  
1056 doi:10.1126/science.1232033
- 1057 Morin, R. D., O'Connor, M. D., Griffith, M., Kuchenbauer, F., Delaney, A., Prabhu, A. L., . . .  
1058 Marra, M. A. (2008). Application of massively parallel sequencing to microRNA  
1059 profiling and discovery in human embryonic stem cells. *Genome Res*, 18(4), 610-621.  
1060 doi:10.1101/gr.7179508
- 1061 Murmann, A. E., Gao, Q. Q., Putzbach, W. T., Patel, M., Bartom, E. T., Law, C. Y., . . . Peter, M. E.  
1062 (2018). Small interfering RNAs based on huntingtin trinucleotide repeats are highly  
1063 toxic to cancer cells. *EMBO Rep*, 19, e45336.
- 1064 Murmann, A. E., Yu, J., Opal, P., & Peter, M. E. (2018). Trinucleotide repeat expansion  
1065 diseases, RNAi and cancer. *Trends in Cancer*, In press.
- 1066 Nisihara, T., Ushio, Y., Higuchi, H., Kayagaki, N., Yamaguchi, N., Soejima, K., . . . Yagita, H.  
1067 (2001). Humanization and epitope mapping of neutralizing anti-human Fas ligand  
1068 monoclonal antibodies: structural insights into Fas/Fas ligand interaction. *J*  
1069 *Immunol*, 167(6), 3266-3275.
- 1070 Novoradovsky, A., Zhang, V., Ghosh, M., Hogrefe, H., Sorge, J. A., & Gaasterland, T. (2005).  
1071 Computational Principles of Primer Design for Site Directed Mutagenesis. *Comp Biol*,  
1072 1, 532-535.
- 1073 Patel, M., & Peter, M. E. (2017). Identification of DISE-inducing shRNAs by monitoring  
1074 cellular responses. *Cell Cycle*, 0. doi:10.1080/15384101.2017.1383576
- 1075 Putzbach, W., Gao, Q. Q., Patel, M., Haluck-Kangas, A., Murmann, A. E., & Peter, M. E. (2018).  
1076 DISE - A Seed Dependent RNAi Off-Target Effect that Kills Cancer Cells. *Trends in*  
1077 *Cancer*, 4, 10-19.
- 1078 Putzbach, W., Gao, Q. Q., Patel, M., van Dongen, S., Haluck-Kangas, A., Sarshad, A. A., . . . Peter,  
1079 M. E. (2017). Many si/shRNAs can kill cancer cells by targeting multiple survival  
1080 genes through an off-target mechanism. *Elife*, 6, e29702.
- 1081 Robinson, M. D., McCarthy, D. J., & Smyth, G. K. (2010). edgeR: a Bioconductor package for  
1082 differential expression analysis of digital gene expression data. *Bioinformatics*,  
1083 26(1), 139-140. doi:10.1093/bioinformatics/btp616
- 1084 Schneider, P., Bodmer, J. L., Holler, N., Mattmann, C., Scuderi, P., Terskikh, A., . . . Tschopp, J.  
1085 (1997). Characterization of Fas (Apo-1, CD95)-Fas ligand interaction. *J Biol Chem*,  
1086 272(30), 18827-18833.

- 1087 Stothard, P. (2000). The sequence manipulation suite: JavaScript programs for analyzing  
1088 and formatting protein and DNA sequences. *Biotechniques*, 28(6), 1102, 1104.
- 1089 Suda, T., Takahashi, T., Golstein, P., & Nagata, S. (1993). Molecular cloning and expression of  
1090 the Fas ligand, a novel member of the tumor necrosis factor family. *Cell*, 75(6), 1169-  
1091 1178.
- 1092 Sudarshan, S., Holman, D. H., Hyer, M. L., Voelkel-Johnson, C., Dong, J. Y., & Norris, J. S.  
1093 (2005). In vitro efficacy of Fas ligand gene therapy for the treatment of bladder  
1094 cancer. *Cancer gene therapy*, 12(1), 12-18. doi:10.1038/sj.cgt.7700746
- 1095 Sun, H., Liu, Y., Bu, D., Liu, X., Norris, J. S., & Xiao, S. (2012). Efficient growth suppression and  
1096 apoptosis in human laryngeal carcinoma cell line HEP-2 induced by an adeno-  
1097 associated virus expressing human FAS ligand. *Head Neck*, 34(11), 1628-1633.  
1098 doi:10.1002/hed.21985
- 1099 Wang, T., Birsoy, K., Hughes, N. W., Krupczak, K. M., Post, Y., Wei, J. J., . . . Sabatini, D. M.  
1100 (2015). Identification and characterization of essential genes in the human genome.  
1101 *Science*, 350(6264), 1096-1101. doi:10.1126/science.aac7041
- 1102 Yamashita, R., Suzuki, Y., Takeuchi, N., Wakaguri, H., Ueda, T., Sugano, S., & Nakai, K. (2008).  
1103 Comprehensive detection of human terminal oligo-pyrimidine (TOP) genes and  
1104 analysis of their characteristics. *Nucleic Acids Res*, 36(11), 3707-3715.  
1105 doi:10.1093/nar/gkn248
- 1106 Yoda, M., Cifuentes, D., Izumi, N., Sakaguchi, Y., Suzuki, T., Giraldez, A. J., & Tomari, Y. (2013).  
1107 Poly(A)-specific ribonuclease mediates 3'-end trimming of Argonaute2-cleaved  
1108 precursor microRNAs. *Cell Rep*, 5(3), 715-726. doi:10.1016/j.celrep.2013.09.029  
1109



Figure 1

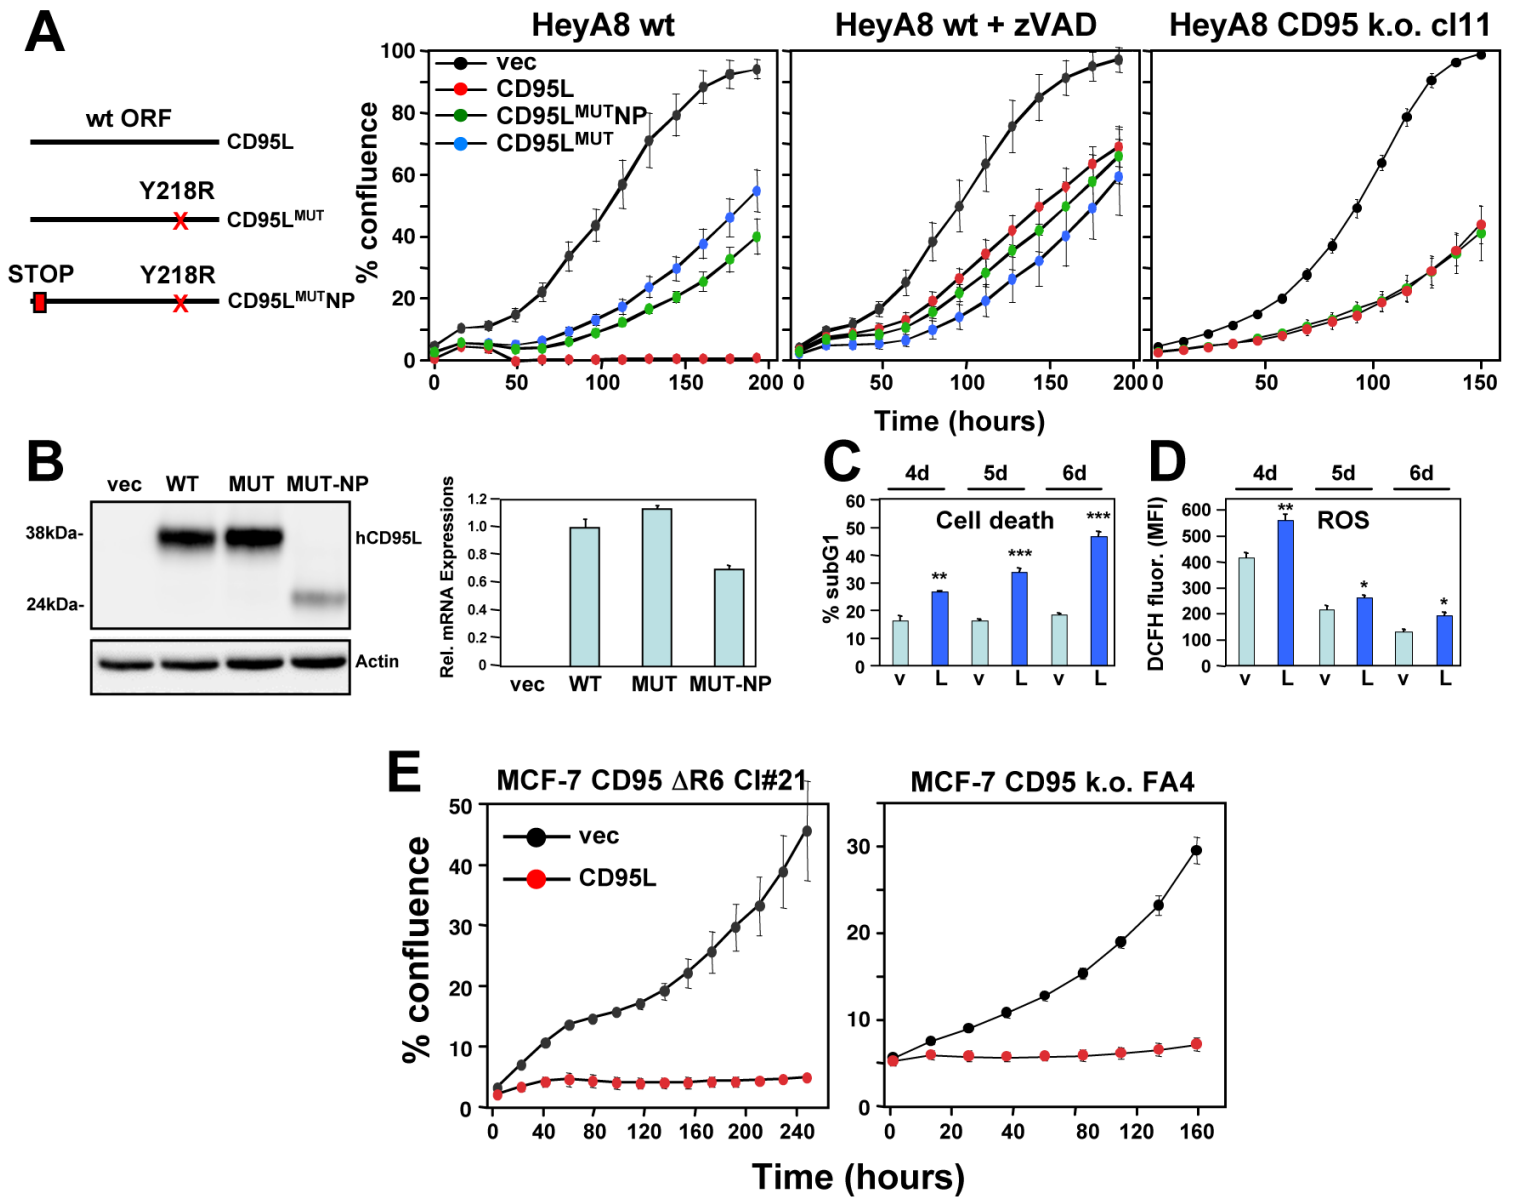

Figure 1 - figure supplement 1

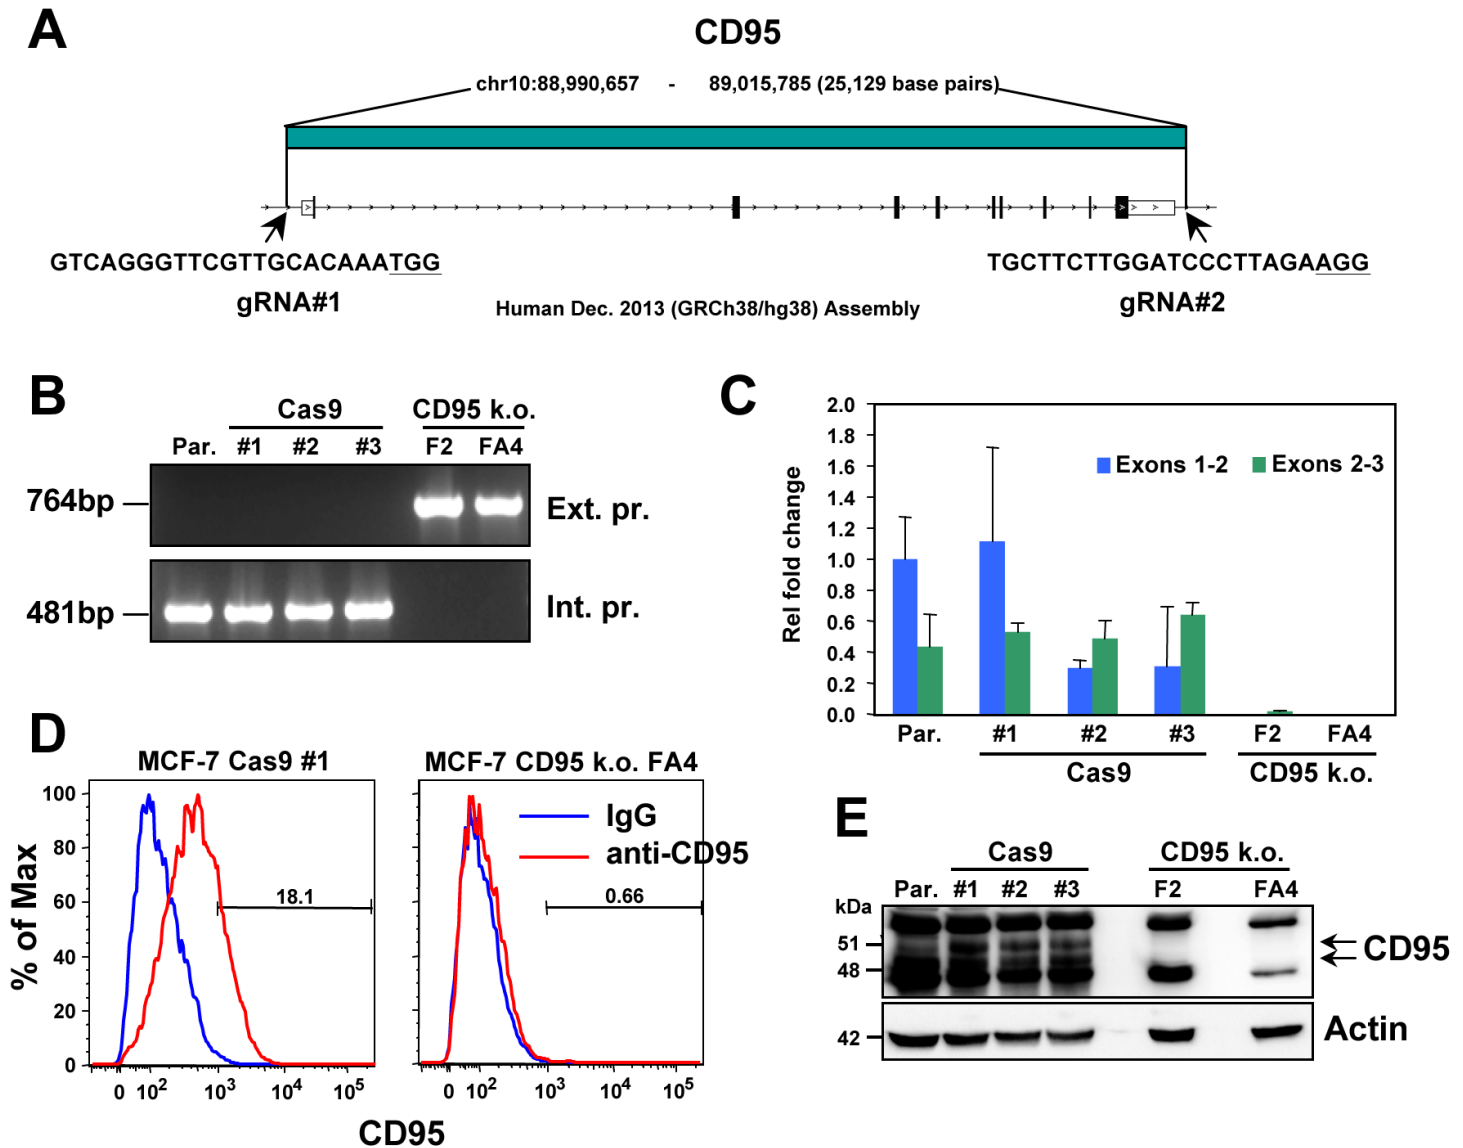

Figure 1 – figure supplement 2

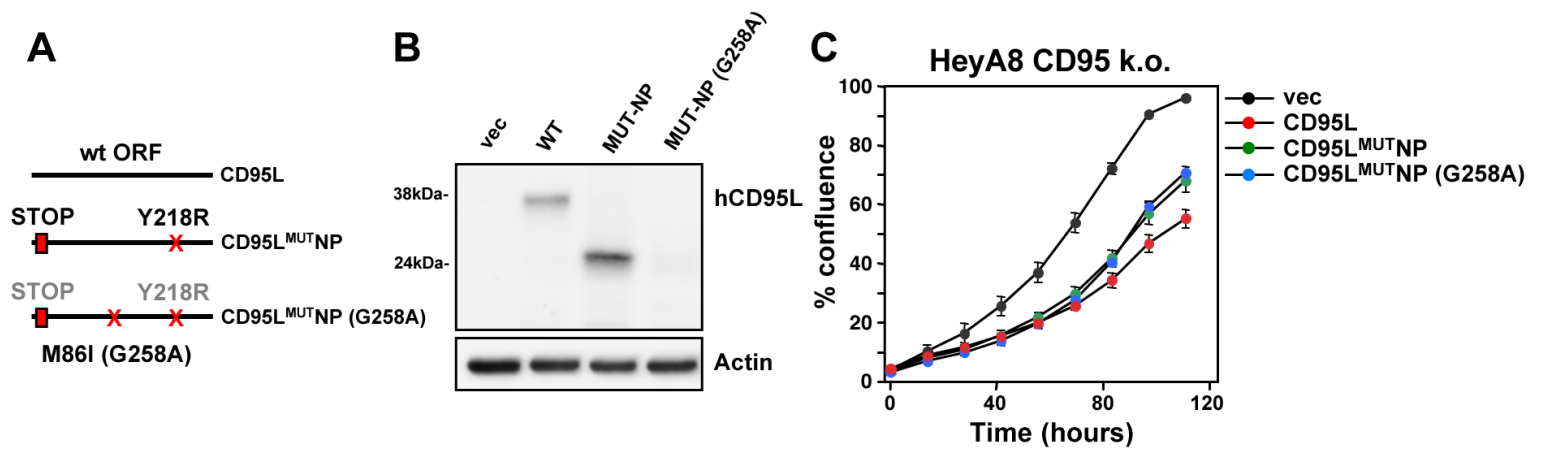



Figure 2

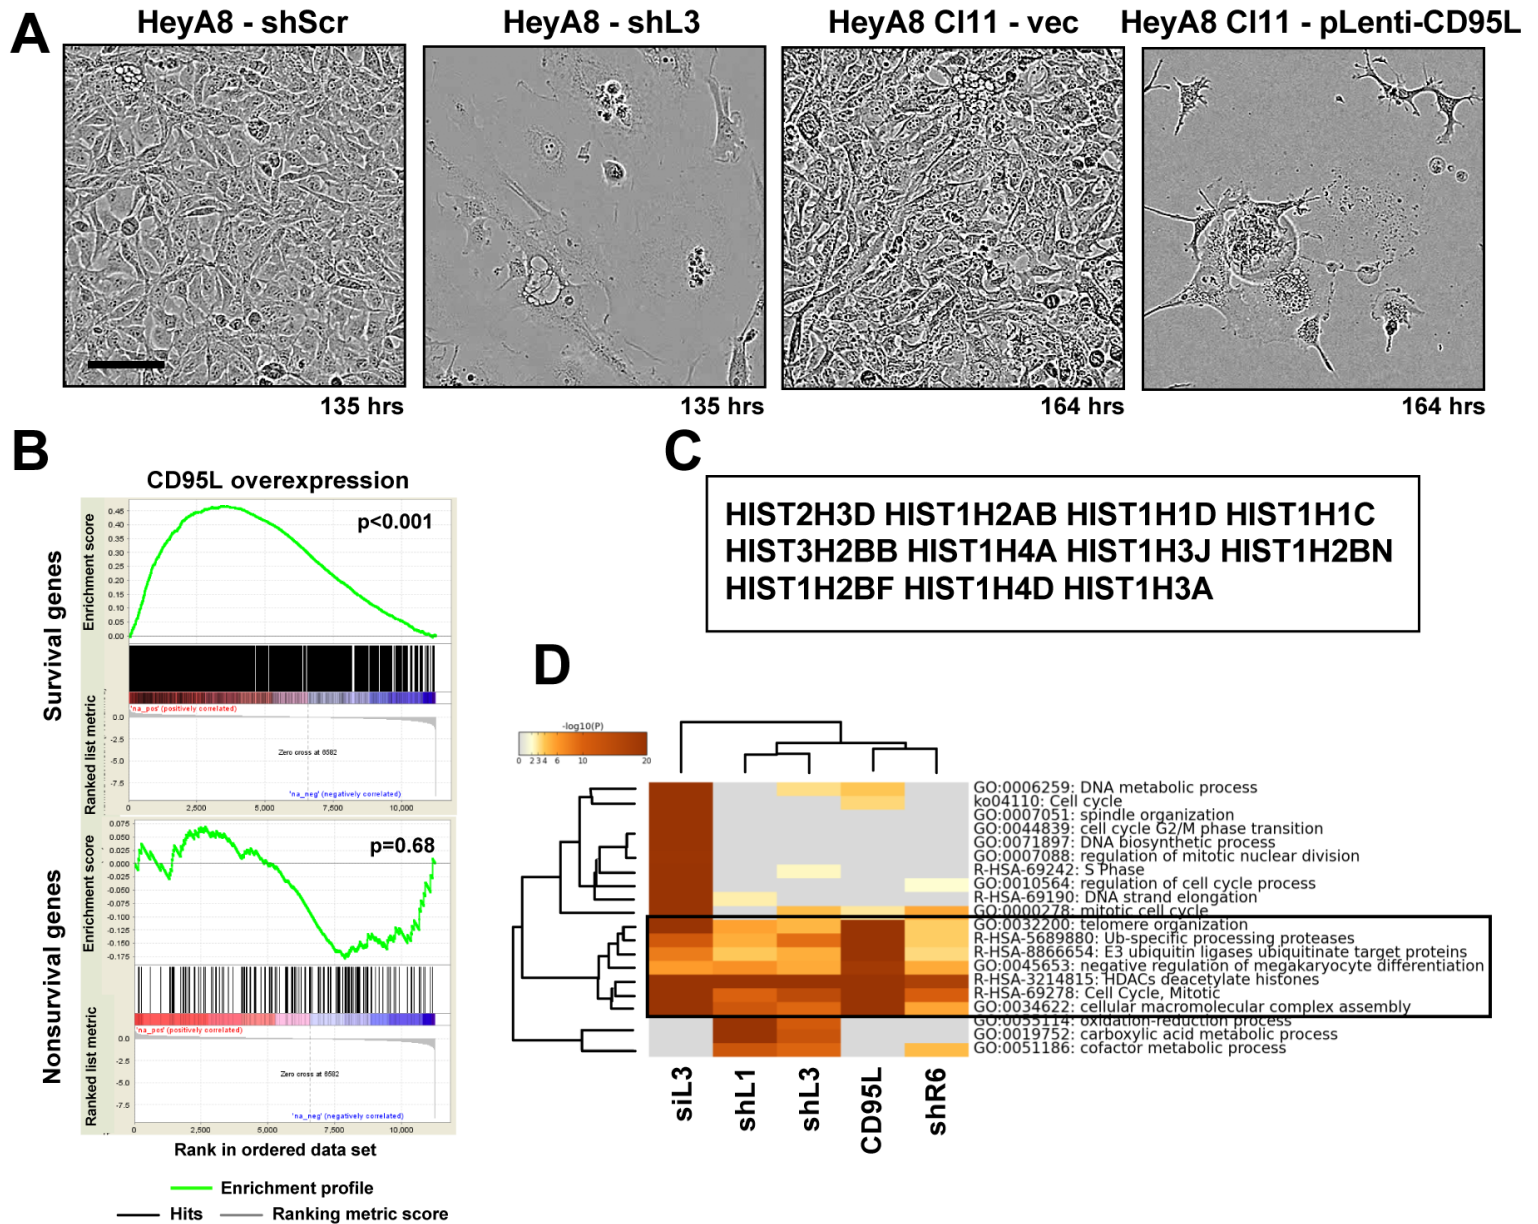

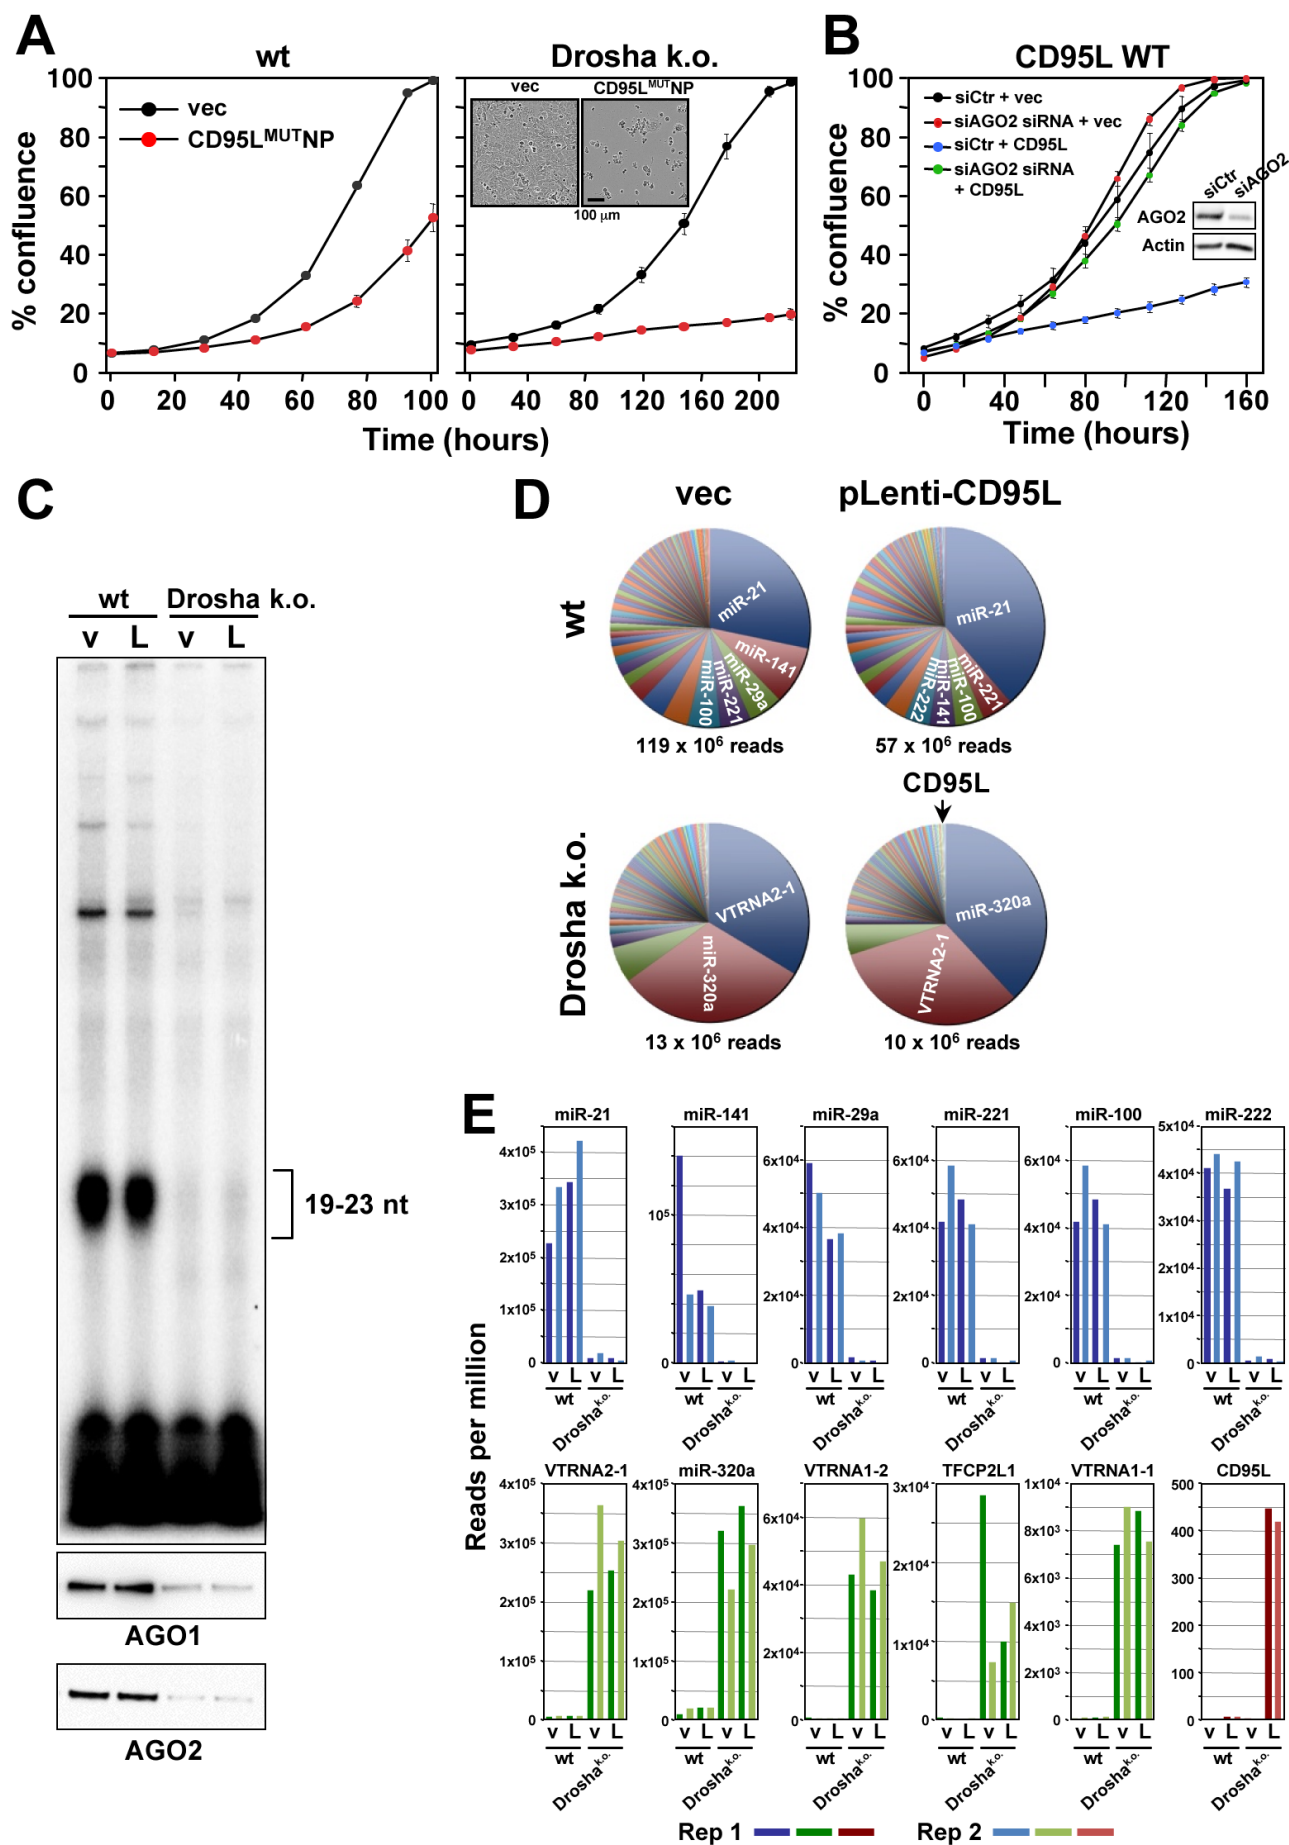



Figure 3, figure supplement 1

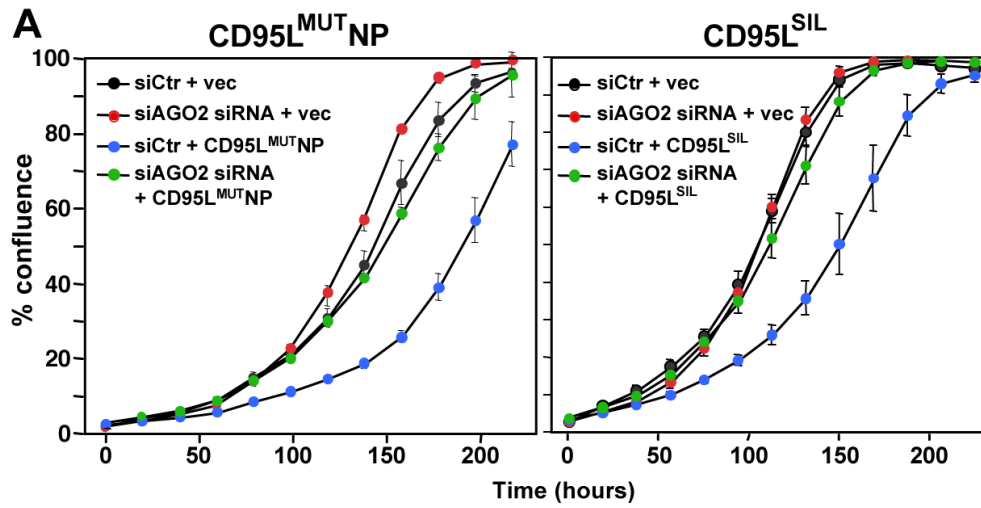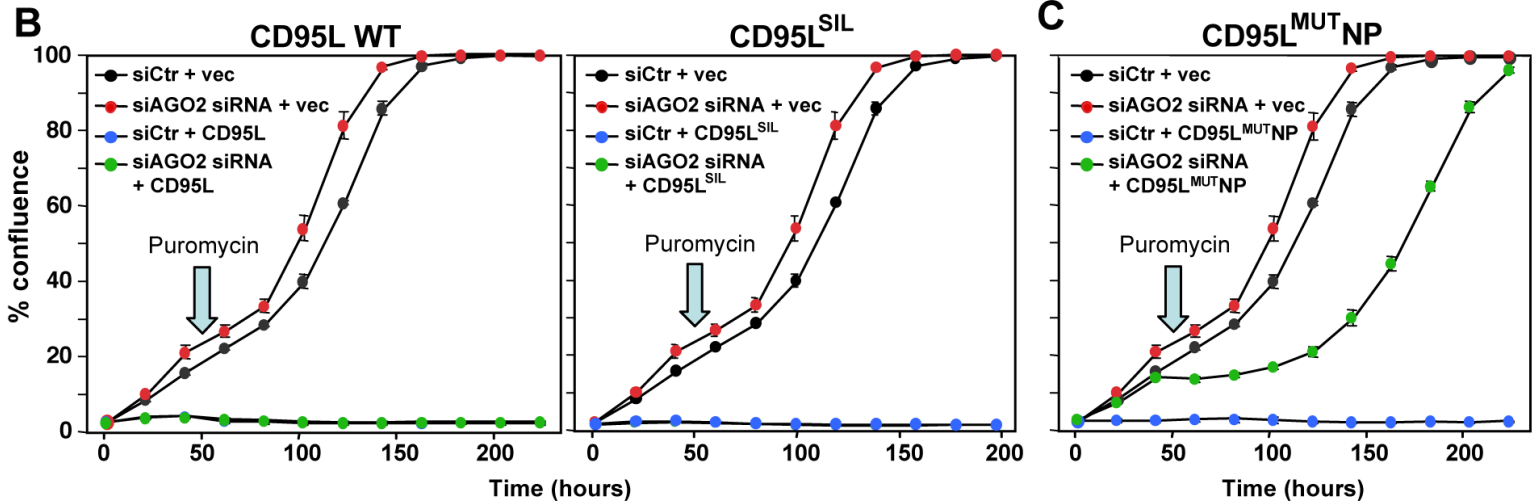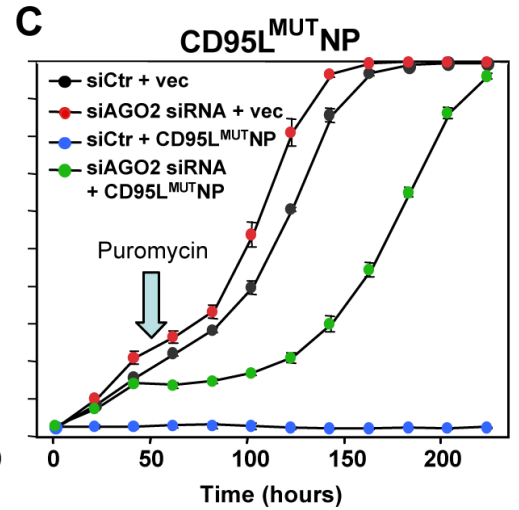



Figure 4

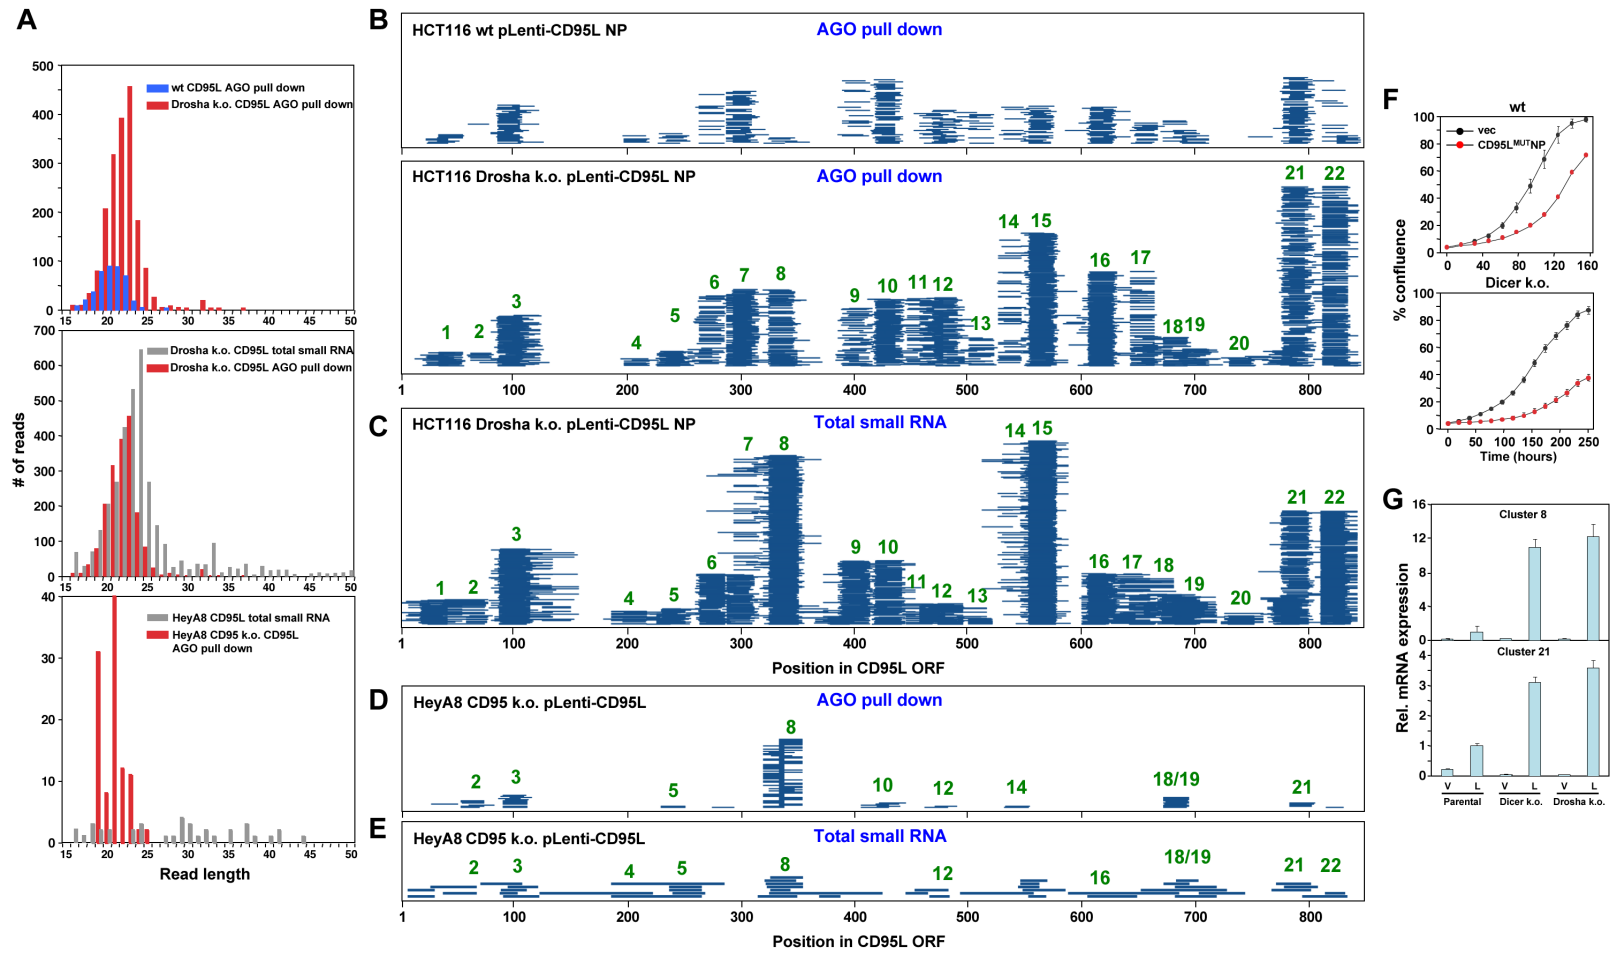

Figure 4 - figure supplement 1

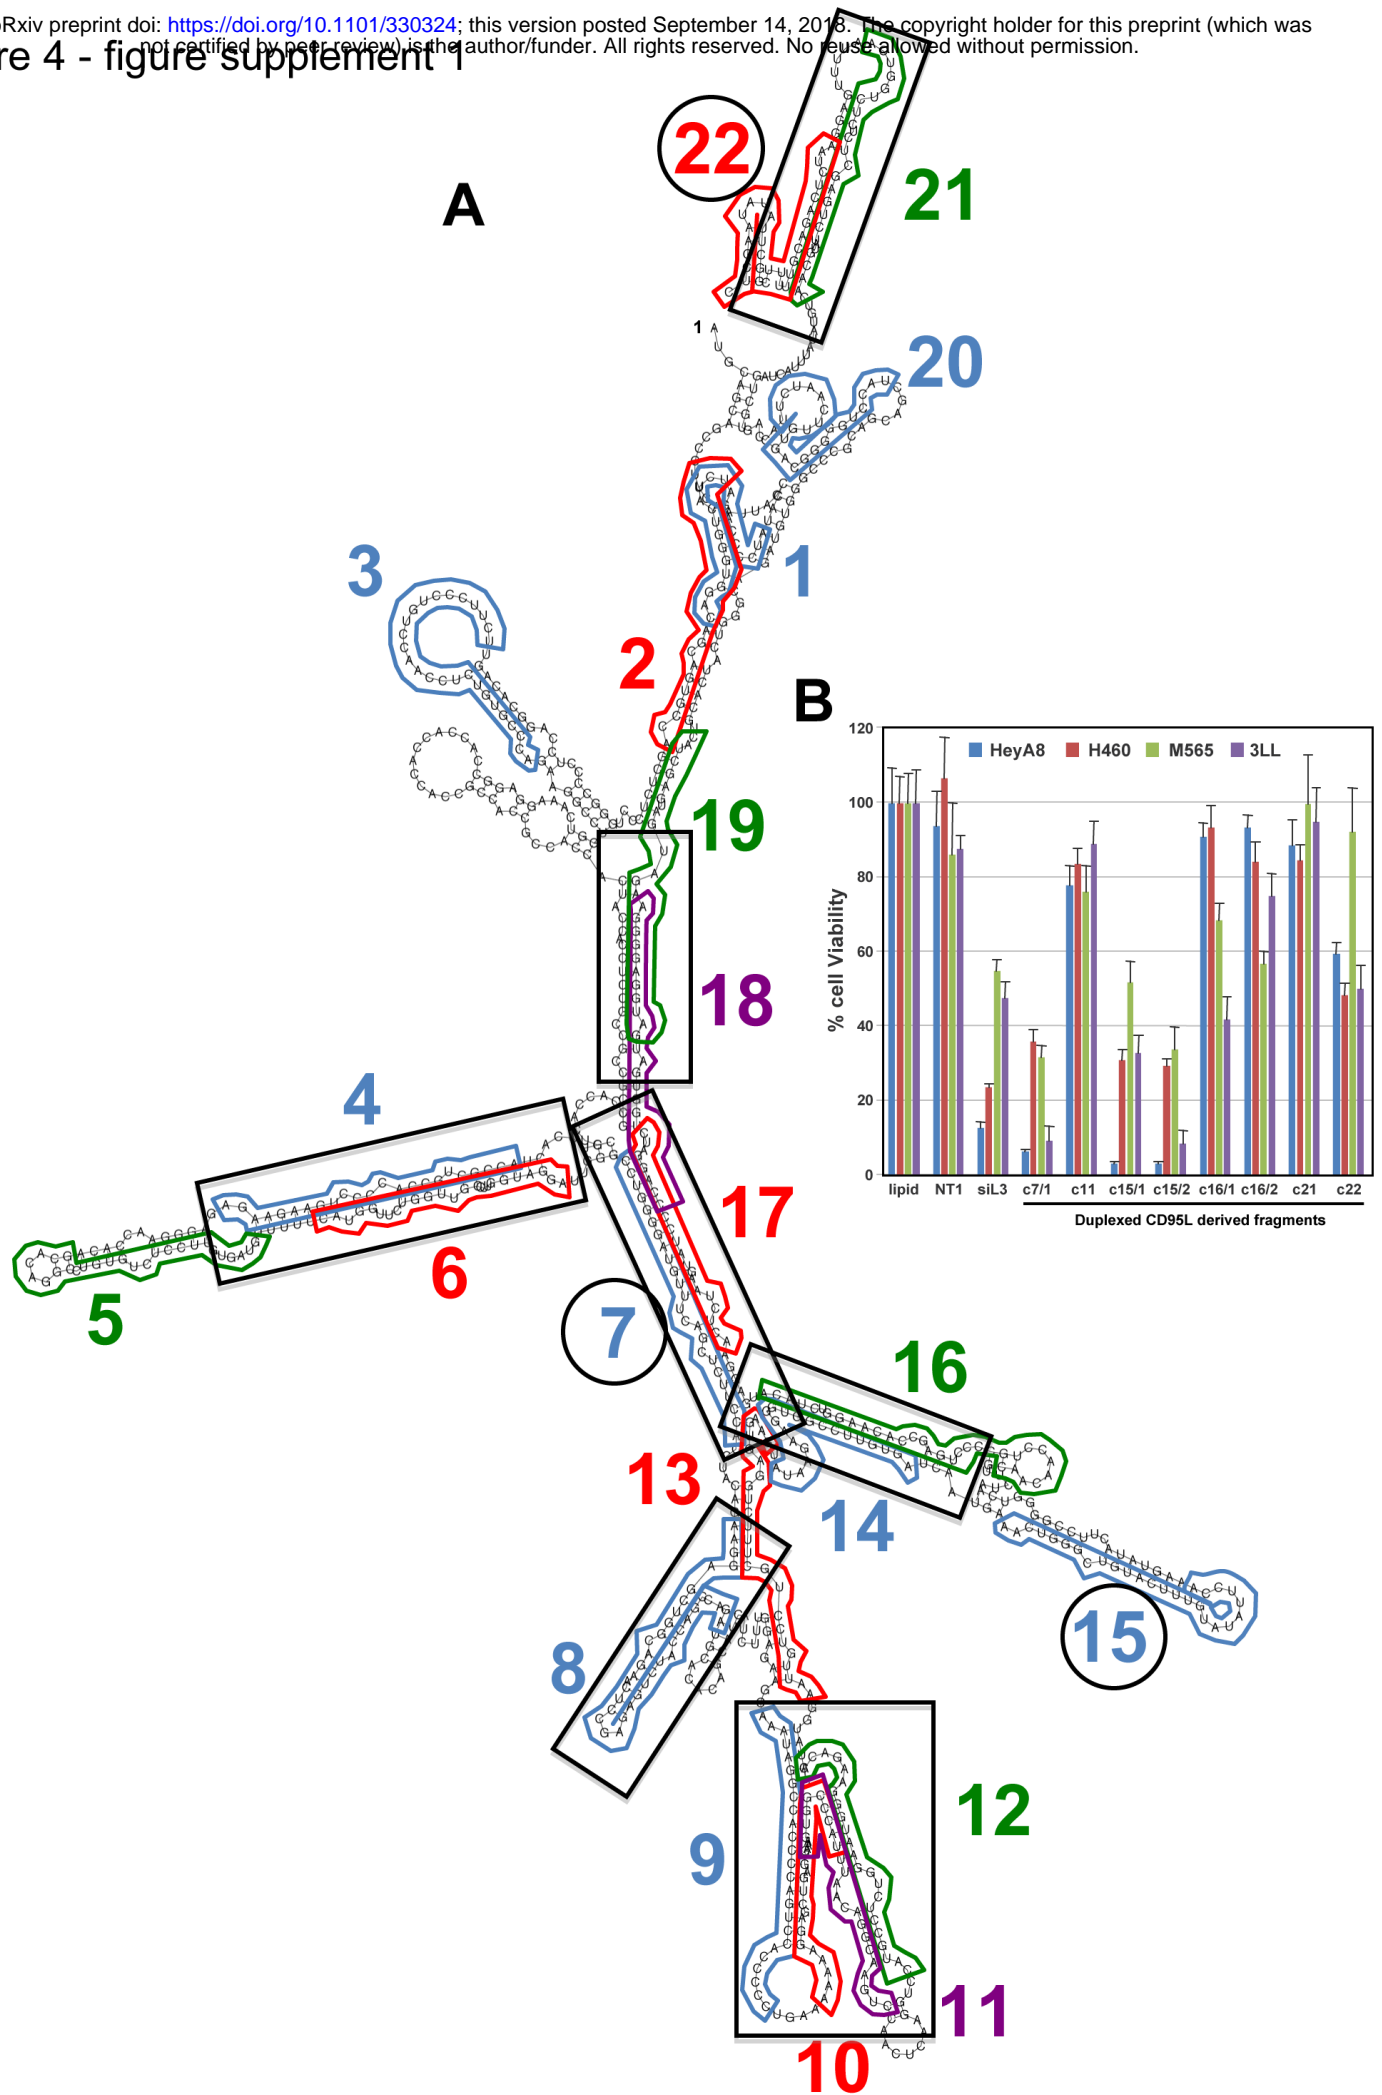

Figure 4 - figure supplement 2

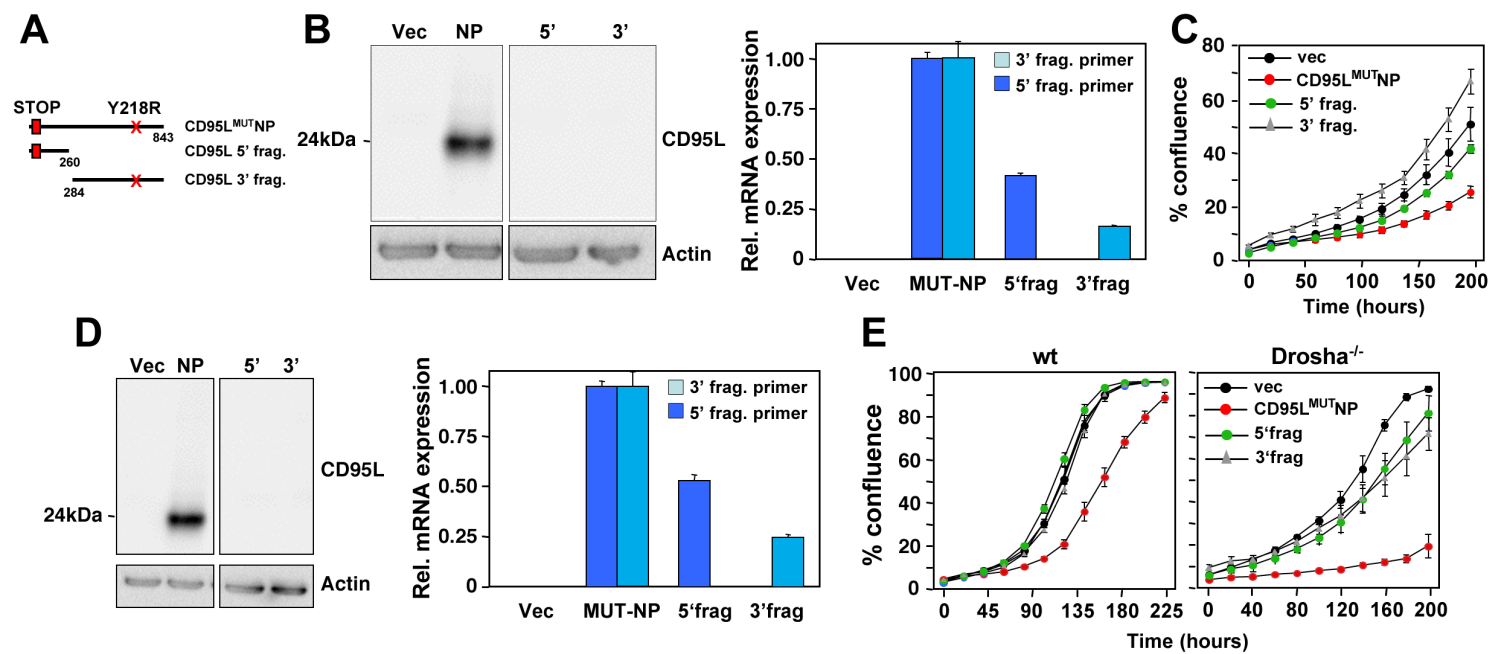

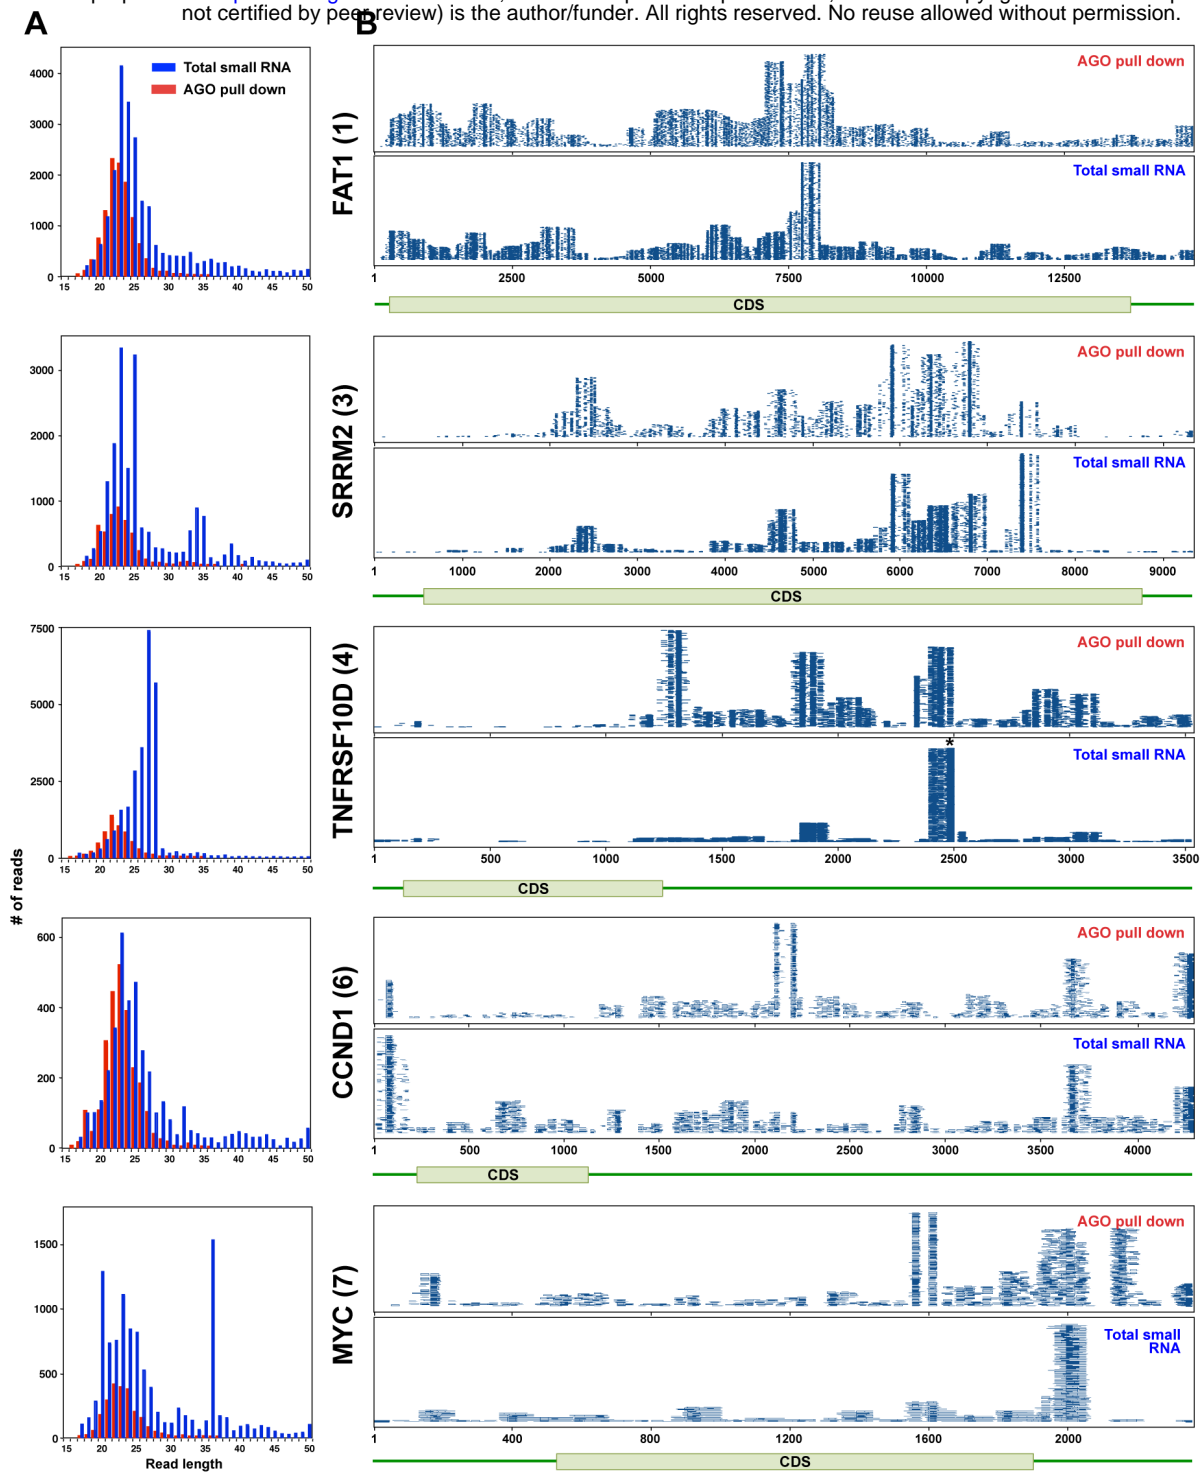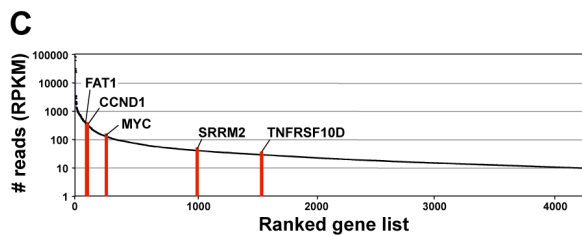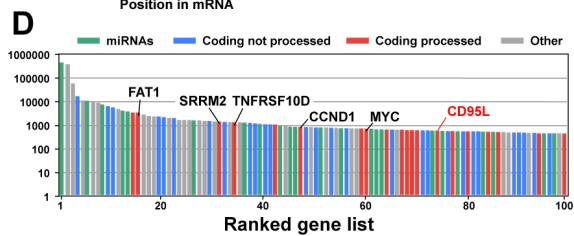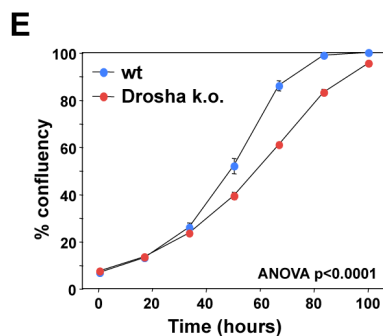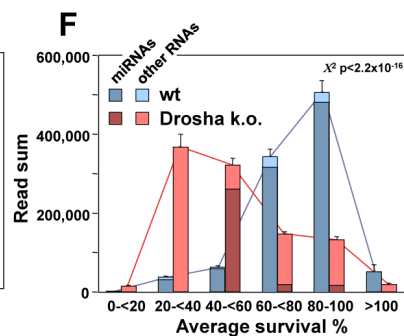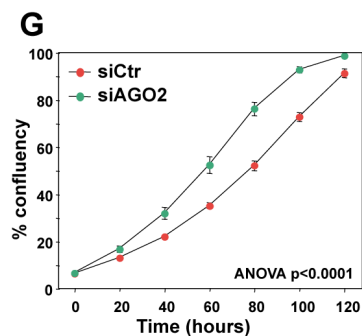

Figure 5 – figure supplement 1

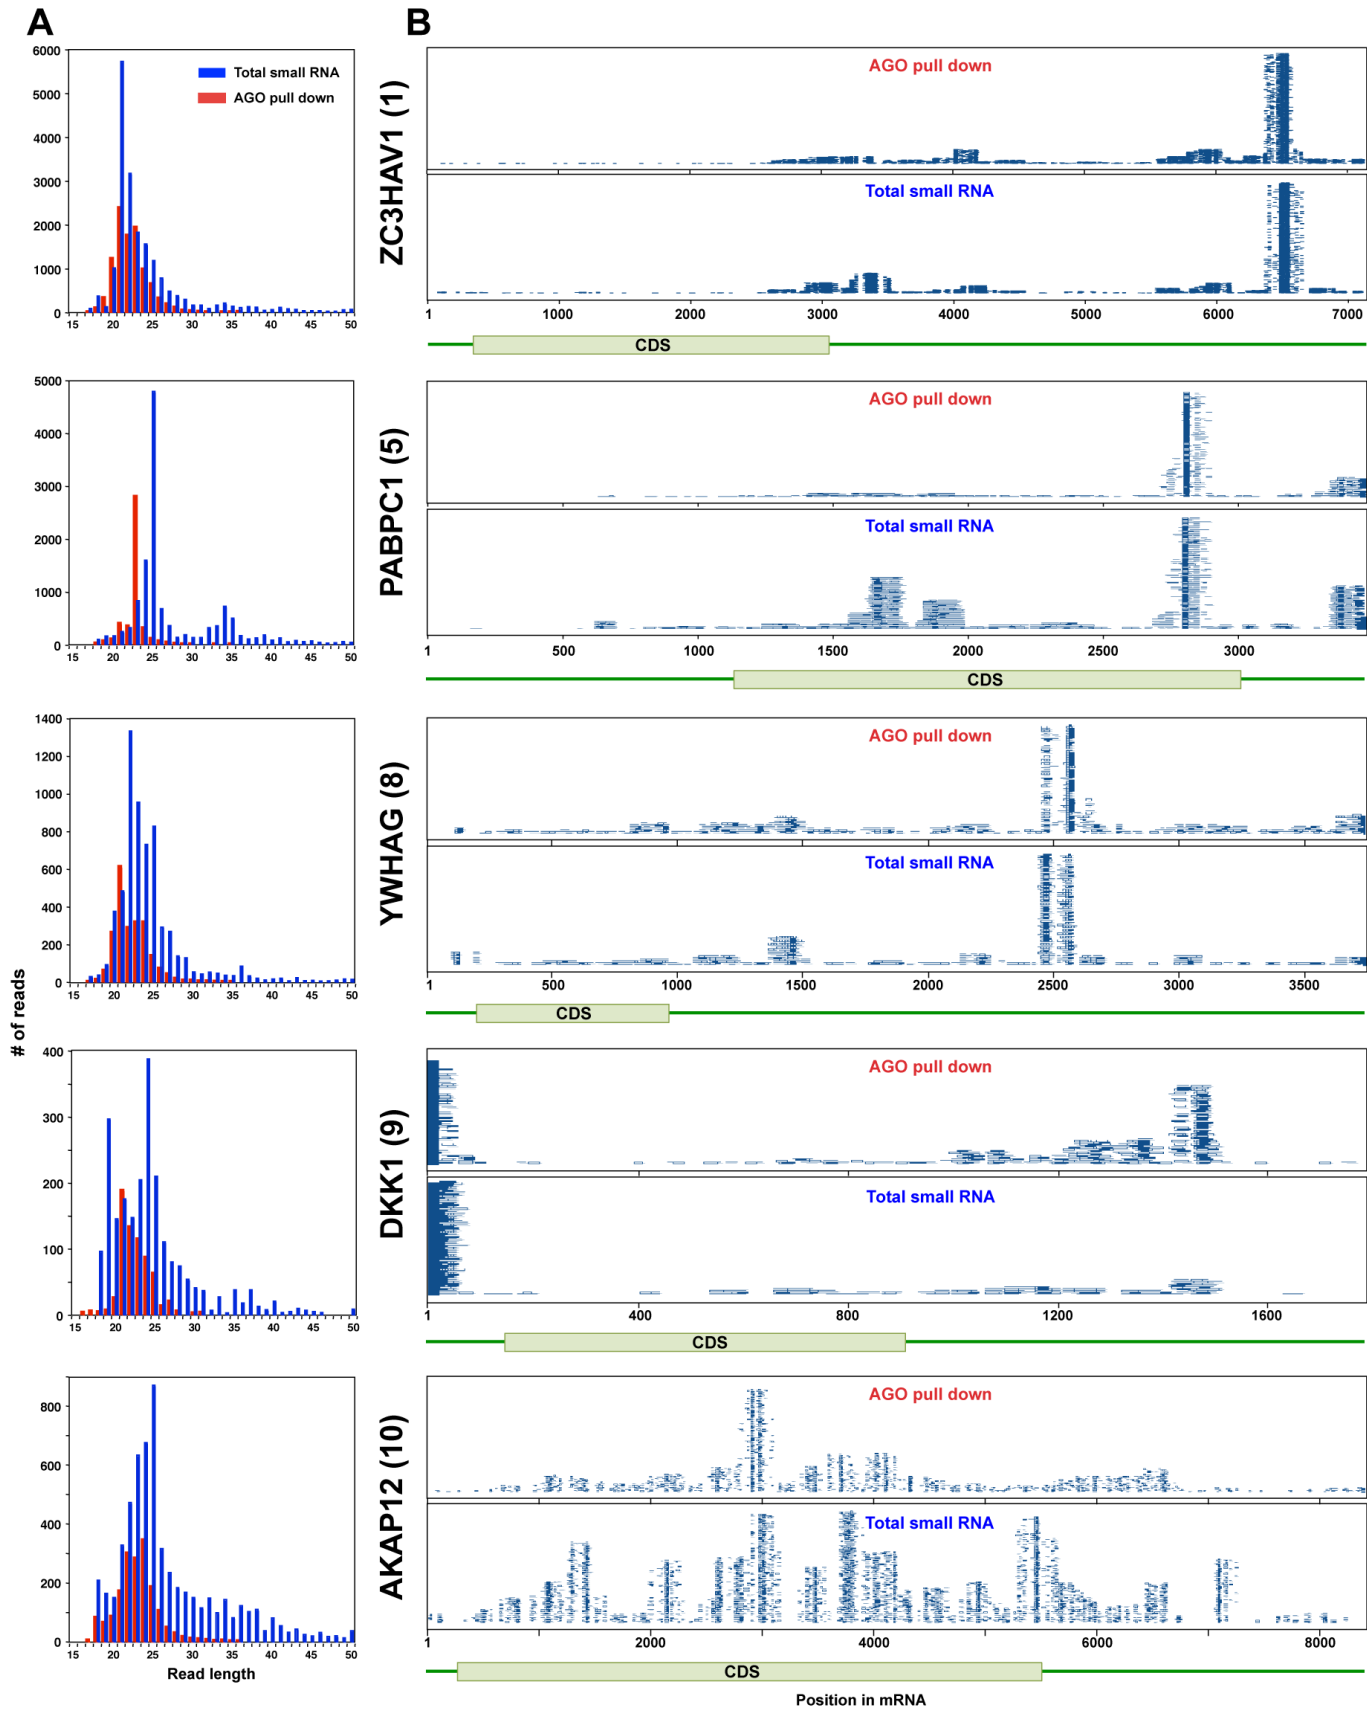





**A**

| Term       | Process                                                      | Count | %    | p-value  | Genes                                                                                                                                                                                                                                                                                                                                                                                                                                                                                            | Fold Enrichment | Bonferroni  |
|------------|--------------------------------------------------------------|-------|------|----------|--------------------------------------------------------------------------------------------------------------------------------------------------------------------------------------------------------------------------------------------------------------------------------------------------------------------------------------------------------------------------------------------------------------------------------------------------------------------------------------------------|-----------------|-------------|
| GO:0006414 | Translational elongation                                     | 46    | 7.1  | 1.09E-36 | RPL18, RPL14, RPL13, RPL15, RPL27A, RPL37, RPS2, RPS3, RPS26, RPS27, RPS28, RPL32, RPL7, RPLP0, RPLP1, RPL10, FAU, RPL12, RPL7A, RPS20, RPL4, RPS27A, RPS23, RPS24, RPL35A, EIF1A1, RPL26, RPL27, EEF2, RPS6, RPL28, RPS8, RPS7, RPS18, RPS19, RPL23, RPL18A, RPL41, RPS16, RPL22, RPL21, RPS15, UBB, EEF1G, UBB, UBA52                                                                                                                                                                          | 11.6            | 2.22E-33    |
| GO:0006412 | Translation                                                  | 69    | 10.6 | 1.44E-30 | RPL18, RPL14, COP55, RPL13, EIF5, RPL16, RPL22L1, RPS2, MRPS30, RPS3, EIF4EBP2, RPLP0, RPLP1, RPL10, FAU, EIF1, RPL12, RPS27A, RPL35A, EIF2S3, EEF2, TAR5, EIF4G2, RPS18, RPS19, RPL41, RPS16, EIF4A2, RPS15, UBC, EEF1G, UBB, UBA52, MRPS12, PABPC4, RPL27A, RPL37, MTIF2, DTD1, RPS26, RPS27, EIF3A, RPS28, EIF3B, RPL7, RPL32, EIF3F, EIF3L, RPL7A, RPL4, RPS20, RPS23, RPS24, EIF1A1, PAIP1, RPL25, RPL27, LRRC47, RPS6, RPS8, RPL28, RPS7, EIF4B, EIF4E, RPL23, RPL18A, GSPT1, RPL22, RPL21 | 5.3             | 2.94E-27    |
| GO:0042274 | Ribosomal small subunit biogenesis                           | 8     | 1.2  | 3.92E-08 | RPS28, RPS19, RPS16, RPS15, NPM1, RPS6, RPS7, RPS24                                                                                                                                                                                                                                                                                                                                                                                                                                              | 18.5            | 8.01E-05    |
| GO:0044265 | Cellular macromolecule catabolic process                     | 60    | 9.2  | 6.74E-08 | NCBP1, LDLR, SAE1, KLHL21, DDA1, MYC, RPS27A, CUL1, VCP, ANAPC5, CYCS, GAN, MYH9, UBE2N, SENP2, EIF4A3, KLHL15, UBC, RNF139, MDM2, CAND1, USP22, KIAH2, UBB, SPOPL, UBE2S, UBA52, DERL1, UBE2Z, UBE3A, PABPC4, HSPA18, UBE3C, FEM1B, FEM1A, STUB1, RBX1, ZFP36L1, PSMB4, SUMO2, ARIH1, SQSTM1, FBXW2, FBXO5, RNF167, USP33, FBXO45, FBXO7, NPLOC4, CBL, CDC20, SUGT1, UBL5, GSPT1, PSMD12, VCP, DCP2, UBA2, WSB2, FBXO30                                                                         | 2.1             | 1.38E-04    |
| GO:0070647 | Protein modification by small protein conjugation or removal | 23    | 3.5  | 2.82E-07 | COP55, UBE3A, CBL, SAE1, UBE3C, STUB1, RBX1, UBE2N, SENP2, SUMO2, VCP, GSPT1, UBC, MDM2, CAND1, UBB, RNF167, USP22, KIAH2, USP33, UBA52, RPS27A, VCP, ANAPC5                                                                                                                                                                                                                                                                                                                                     | 3.7             | 5.77E-04    |
| GO:0007049 | Cell cycle                                                   | 61    | 9.4  | 3.02E-07 | NBN, CNTN1, MCM7, FANCI, VPS4A, DYNCH11, CDC45, MYC, TUBB3, RPS27A, CUL1, ZW10, VCP, ANAPC5, CCNF, CDK6, CDC5L, MYH9, HMG2A, PPP1CC, AHR, MAPK1, EIF4G2, PPM1D, CCND1, CHMP1B, UBC, MDM2, NEK9, USP22, STMN1, KIAH2, UBB, NUP43, GADD45A, UBA52, CKS1B, STK11, SESN2, ITGB1, UHMK1, PSMB4, NPM1, FBXO5, PAFAH1B1, SKA2, TERF2, TDFP1, PARDB8, MIB1, ANXA1, BIRC5, CDC20, APPL1, SUGT1, HDAC3, CDKN1A, PLK2, GSPT1, PSMD12, CALM3                                                                 | 2.0             | 6.16E-04    |
| GO:0009057 | Macromolecule catabolic process                              | 61    | 9.4  | 3.76E-07 | NCBP1, SPG7, LDLR, SAE1, KLHL21, DDA1, MYC, RPS27A, CUL1, VCP, ANAPC5, CYCS, GAN, MYH9, UBE2N, SENP2, EIF4A3, KLHL15, UBC, RNF139, MDM2, CAND1, USP22, KIAH2, UBB, SPOPL, UBE2S, UBA52, DERL1, UBE2Z, UBE3A, PABPC4, HSPA18, UBE3C, FEM1B, FEM1A, STUB1, RBX1, ZFP36L1, PSMB4, SUMO2, ARIH1, SQSTM1, FBXW2, FBXO5, RNF167, USP33, FBXO45, FBXO7, NPLOC4, CBL, CDC20, SUGT1, UBL5, GSPT1, PSMD12, VCP, DCP2, UBA2, WSB2, FBXO30                                                                   | 2.0             | 7.68E-04    |
| GO:0019941 | Modification-dependent protein catabolic process             | 49    | 7.6  | 5.58E-07 | SAE1, KLHL21, DDA1, CUL1, RPS27A, VCP, ANAPC5, GAN, SENP2, UBE2N, KLHL15, RNF139, UBC, MDM2, CAND1, KIAH2, UBB, USP22, SPOPL, UBE2S, UBA52, DERL1, UBE2Z, UBE3A, UBE3C, FEM1B, FEM1A, STUB1, RBX1, SUMO2, ARIH1, PSMB4, SQSTM1, FBXW2, FBXO5, RNF167, USP33, FBXO45, FBXO7, NPLOC4, CBL, CDC20, SUGT1, UBL5, PSMD12, VCP, UBA2, WSB2, FBXO30                                                                                                                                                     | 2.2             | 0.001139592 |
| GO:0043632 | Modification-dependent macromolecule catabolic process       | 49    | 7.6  | 5.58E-07 | SAE1, KLHL21, DDA1, CUL1, RPS27A, VCP, ANAPC5, GAN, SENP2, UBE2N, KLHL15, RNF139, UBC, MDM2, CAND1, KIAH2, UBB, USP22, SPOPL, UBE2S, UBA52, DERL1, UBE2Z, UBE3A, UBE3C, FEM1B, FEM1A, STUB1, RBX1, SUMO2, ARIH1, PSMB4, SQSTM1, FBXW2, FBXO5, RNF167, USP33, FBXO45, FBXO7, NPLOC4, CBL, CDC20, SUGT1, UBL5, PSMD12, VCP, UBA2, WSB2, FBXO30                                                                                                                                                     | 2.2             | 0.001139592 |
| GO:0051603 | Proteolysis involved in cellular protein catabolic process   | 50    | 7.7  | 8.41E-07 | SAE1, KLHL21, DDA1, CUL1, RPS27A, VCP, ANAPC5, GAN, MYH9, SENP2, UBE2N, KLHL15, RNF139, UBC, MDM2, CAND1, KIAH2, UBB, USP22, SPOPL, UBE2S, UBA52, DERL1, UBE2Z, UBE3A, UBE3C, FEM1B, FEM1A, STUB1, RBX1, SUMO2, ARIH1, PSMB4, SQSTM1, FBXW2, FBXO5, RNF167, USP33, FBXO45, FBXO7, NPLOC4, CBL, CDC20, SUGT1, UBL5, PSMD12, VCP, UBA2, WSB2, FBXO30                                                                                                                                               | 2.1             | 0.001716096 |
| GO:0032446 | Protein modification by small protein conjugation            | 20    | 3.1  | 9.00E-07 | UBE3A, CBL, SAE1, UBE3C, STUB1, RBX1, UBE2N, SUMO2, VCP, GSPT1, UBC, MDM2, CAND1, UBB, RNF167, USP22, KIAH2, UBA52, RPS27A, VCP, ANAPC5                                                                                                                                                                                                                                                                                                                                                          | 3.9             | 0.001836854 |
| GO:0044257 | Cellular protein catabolic process                           | 50    | 7.7  | 9.92E-07 | SAE1, KLHL21, DDA1, CUL1, RPS27A, VCP, ANAPC5, GAN, MYH9, SENP2, UBE2N, KLHL15, RNF139, UBC, MDM2, CAND1, KIAH2, UBB, USP22, SPOPL, UBE2S, UBA52, DERL1, UBE2Z, UBE3A, UBE3C, FEM1B, FEM1A, STUB1, RBX1, SUMO2, ARIH1, PSMB4, SQSTM1, FBXW2, FBXO5, RNF167, USP33, FBXO45, FBXO7, NPLOC4, CBL, CDC20, SUGT1, UBL5, PSMD12, VCP, UBA2, WSB2, FBXO30                                                                                                                                               | 2.1             | 0.002024928 |
| GO:0030163 | Protein catabolic process                                    | 51    | 7.9  | 1.03E-06 | SPG7, SAE1, KLHL21, DDA1, CUL1, RPS27A, VCP, ANAPC5, GAN, MYH9, SENP2, UBE2N, KLHL15, RNF139, UBC, MDM2, CAND1, KIAH2, UBB, USP22, SPOPL, UBE2S, UBA52, DERL1, UBE2Z, UBE3A, UBE3C, FEM1B, FEM1A, STUB1, RBX1, SUMO2, ARIH1, PSMB4, SQSTM1, FBXW2, FBXO5, RNF167, USP33, FBXO45, FBXO7, NPLOC4, CBL, CDC20, SUGT1, UBL5, PSMD12, VCP, UBA2, WSB2, FBXO30                                                                                                                                         | 2.1             | 0.002109812 |
| GO:0006916 | Anti-apoptosis                                               | 25    | 3.9  | 1.79E-06 | IER3, YWHAZ, MCL1, CLU, HSPA1B, BCL2L1, SQSTM1, NPM1, TP1, HSPA5, MYC, RPS27A, HSPA4, ANXA1, BIRC5, SOD2, SERPINB9, HDAC3, SON, TNFRSF10D, CFL1, UBC, UBB, UBA52, GSPT1                                                                                                                                                                                                                                                                                                                          | 3.1             | 0.003641287 |
| GO:0022613 | Ribonucleoprotein complex biogenesis                         | 23    | 3.5  | 2.18E-06 | RPL35A, NCBP1, RPL14, DDX1, RPL26, SNRPD1, RPS6, RPS7, EIF4A3, EIF3A, RPS19, RPS28, RRP18, RPL7, RPLP0, RPS15, NPM1, SNRPB, WDR3, RPL7A, GEMIN4, RPS24                                                                                                                                                                                                                                                                                                                                           | 3.3             | 0.004410943 |
| GO:0044082 | Negative regulation of molecular function                    | 33    | 5.1  | 2.80E-06 | GNAI3, SNX6, EGLN1, PRDX3, SPRY4, TRIB1, RPS3, PSMB4, PAK2, PPP2CA, FBXO5, HSPA5, SFRP1, DDX1, NOD1, RPS27A, ANAPC5, CEBPB, BIRC5, CDC20, YWHAZ, CDKN1A, PSMD12, ID1, UBC, CALM3, CAND1, ID3, UBB, GADD45B, GADD45A, DNAJB6, UBA52, DUSP6                                                                                                                                                                                                                                                        | 2.5             | 0.005698339 |
| GO:0016567 | Protein ubiquitination                                       | 18    | 2.8  | 3.74E-06 | UBE3A, CBL, SAE1, UBE3C, STUB1, RBX1, UBE2N, VCP, GSPT1, UBC, MDM2, CAND1, UBB, RNF167, USP22, KIAH2, UBA52, RPS27A, VCP, ANAPC5                                                                                                                                                                                                                                                                                                                                                                 | 3.9             | 0.007616412 |
| GO:0042254 | Ribosome biogenesis                                          | 18    | 2.8  | 5.29E-06 | RPL35A, RPL14, RPL26, RPS6, RPS7, EIF4A3, RPS19, RPS28, RRP18, RPL7, RPS16, RPLP0, RPS15, NPM1, WDR3, RPL7A, GEMIN4, RPS24                                                                                                                                                                                                                                                                                                                                                                       | 3.8             | 0.010742691 |
| GO:0008413 | Translational initiation                                     | 11    | 1.7  | 7.24E-06 | EIF3A, EIF3B, EIF4E, PAIP1, EIF5, EIF3F, EIF2S3, EIF3L, EIF1, MTIF2, RPS3                                                                                                                                                                                                                                                                                                                                                                                                                        | 6.2             | 0.014687352 |
| GO:0034622 | Cellular macromolecular complex assembly                     | 31    | 4.8  | 7.79E-06 | HIST1H2AC, NCBP1, HIST1H2AG, HP1BP3, AP2S1, SNRPD1, NAP1L4, EIF3A, NPM1, VMA21, HIST1H4E, H2AFZ, FBXO5, TNPO1, TUBA1B, TUBA1C, GEMIN4, TUBB3, SCO1, H1FO, HIST1H3J, HIST1H1E, TCF1, HSP90AA1, DDX1, ADM1, HIST2H2BE, HIST2H2BF, RPS15, HIST1H2AI, SNRPB, H3F3B, HIST1H2AK                                                                                                                                                                                                                        | 2.5             | 0.015786186 |
| GO:0042981 | Regulation of apoptosis                                      | 58    | 8.9  | 9.22E-06 | RTN4, IER3, PRDX3, PRDX1, RPS3, AEN, TP1, NQO1, TOP2A, MYC, RPS27A, CUL1, ROCK1, CYCS, ACTN1, PIM3, STK4, MAPK1, SERPINB9, MSX1, TNFRSF10B, TNFRSF10D, IGF2R, JUN, CFL1, UBC, UBB, DCUN1D3, GSTP1, UBA52, YWHAZ, MCL1, CLU, BCL2L1, HSPA1B, FEM1B, SQSTM1, PPP2CA, NPM1, HSP1, HSPA5, TRAF4, HSPA9, PHLDA1, TM2D1, CEBPB, ANXA1, BIRC5, RPS6, SOD2, PPIF, SON, HDAC3, CDKN1A, GSPT1, VCP, ID3, DNAJB6                                                                                            | 1.8             | 0.018660347 |
| GO:0034621 | Cellular macromolecular complex subunit organization         | 33    | 5.1  | 1.12E-05 | HIST1H2AC, NCBP1, HIST1H2AG, HP1BP3, AP2S1, SNRPD1, NAP1L4, EIF3A, PAK2, NPM1, VMA21, HIST1H4E, H2AFZ, FBXO5, TNPO1, TUBA1B, TUBA1C, GEMIN4, TUBB3, SCO1, H1FO, HIST1H3J, HIST1H1E, TCF1, HSP90AA1, DDX1, ADM1, HIST2H2BE, HIST2H2BF, RPS15, HIST1H2AI, SNRPB, H3F3B, HIST1H2AK, STMN1                                                                                                                                                                                                           | 2.4             | 0.022647121 |
| GO:0043067 | Regulation of programmed cell death                          | 58    | 8.9  | 1.22E-05 | RTN4, IER3, PRDX3, PRDX1, RPS3, AEN, TP1, NQO1, TOP2A, MYC, RPS27A, CUL1, ROCK1, CYCS, ACTN1, PIM3, STK4, MAPK1, SERPINB9, MSX1, TNFRSF10B, TNFRSF10D, IGF2R, JUN, CFL1, UBC, UBB, DCUN1D3, GSTP1, UBA52, YWHAZ, MCL1, CLU, BCL2L1, HSPA1B, FEM1B, SQSTM1, PPP2CA, NPM1, HSP1, HSPA5, TRAF4, HSPA9, PHLDA1, TM2D1, CEBPB, ANXA1, BIRC5, RPS6, SOD2, PPIF, SON, HDAC3, CDKN1A, GSPT1, VCP, ID3, DNAJB6                                                                                            | 1.8             | 0.024559192 |
| GO:0006364 | rRNA processing                                              | 15    | 2.3  | 1.28E-05 | RPL35A, RPL14, RPL26, RPS6, RPS7, EIF4A3, RPS19, RPS28, RRP18, RPL7, RPS16, RPS15, WDR3, GEMIN4, RPS24                                                                                                                                                                                                                                                                                                                                                                                           | 4.2             | 0.025799513 |
| GO:0010941 | Regulation of cell death                                     | 58    | 8.9  | 1.38E-05 | RTN4, IER3, PRDX3, PRDX1, RPS3, AEN, TP1, NQO1, TOP2A, MYC, RPS27A, CUL1, ROCK1, CYCS, ACTN1, PIM3, STK4, MAPK1, SERPINB9, MSX1, TNFRSF10B, TNFRSF10D, IGF2R, JUN, CFL1, UBC, UBB, DCUN1D3, GSTP1, UBA52, YWHAZ, MCL1, CLU, BCL2L1, HSPA1B, FEM1B, SQSTM1, PPP2CA, NPM1, HSP1, HSPA5, TRAF4, HSPA9, PHLDA1, TM2D1, CEBPB, ANXA1, BIRC5, RPS6, SOD2, PPIF, SON, HDAC3, CDKN1A, GSPT1, VCP, ID3, DNAJB6                                                                                            | 1.8             | 0.027452057 |
| GO:0016072 | rRNA metabolic process                                       | 15    | 2.3  | 2.10E-05 | RPL35A, RPL14, RPL26, RPS6, RPS7, EIF4A3, RPS19, RPS28, RRP18, RPL7, RPS16, RPS15, WDR3, GEMIN4, RPS24                                                                                                                                                                                                                                                                                                                                                                                           | 4.0             | 0.042090135 |
| GO:0000278 | Mitotic cell cycle                                           | 33    | 5.1  | 2.30E-05 | ITGB1, PSMB4, FBXO5, SKA2, PAFAH1B1, DYNCH11, CDC45, CUL1, RPS27A, TUBB3, ZW10, VCP, ANAPC5, CCNF, CDK6, BIRC5, CDC20, HMG2A, SUGT1, CDKN1A, CCND1, PPM1D, GSPT1, PSMD12, PLK2, UBC, MDM2, NEK9, STMN1, UBB, GADD45A, NUP43, UBA52                                                                                                                                                                                                                                                               | 2.3             | 0.04595049  |
| GO:0016071 | mRNA metabolic process                                       | 33    | 5.1  | 2.30E-05 | NCBP1, SNRPD1, HSPA1B, POLR2D, SF3B2, ZFP36L1, NONO, SRM2, HNRNP, PCBP1, DBP1, PABPC1, HNRNP, GEMIN4, ZCCHC3, PAIP1, CEBPB, HNRNP2A2, DDX1, MTPAP, GRSF1, ELAVL1, CDC5L, DDX5, HNRNP, HNRNP, EIF4A3, SNRNP48, GSPT1, DCP2, SNRPB, CPSF2, SSU72                                                                                                                                                                                                                                                   | 2.3             | 0.04595049  |
| GO:0006446 | Regulation of translational initiation                       | 10    | 1.5  | 2.32E-05 | EIF4B, NCBP1, EIF4G2, EIF3B, EIF4EBP2, EIF4A2, EIF5, DDX1, EIF1, MTIF2                                                                                                                                                                                                                                                                                                                                                                                                                           | 6.2             | 0.046267191 |

**B**

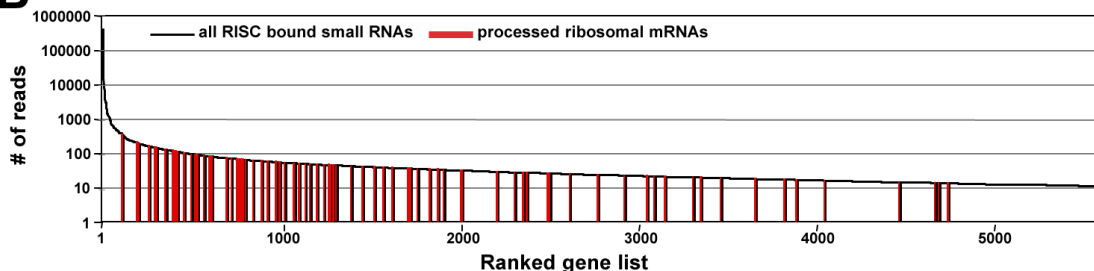

Source: https://www.biorxiv.org/content/10.1101/330324v3.full.pdf
